# Supplementary material
Source: PubMed Central journal article supplement (PMC4154988)
Supplement: NIHMS612561-supplement-2.pdf [file NIHMS612561-supplement-2.pdf]

**Supplementary Table S1. Summary of the Objective Response Measure (ORM) scoring method**

| <b>ORM</b>                   | <b>Abbreviation</b> | <b>Description</b>                                                                                                                    | <b>OR Score</b> | <b>Heat Map</b>                                                                       |
|------------------------------|---------------------|---------------------------------------------------------------------------------------------------------------------------------------|-----------------|---------------------------------------------------------------------------------------|
| Progressive Disease 1        | PD1                 | - HuCD45 <sup>+</sup> never drops below 1% in PB<br>- Event before the end of study<br>- LGD value of <1.5 times EFS of control group | 0               | 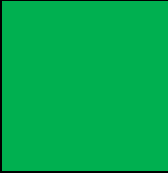   |
| Progressive Disease 2        | PD2                 | - HuCD45 <sup>+</sup> never drops below 1% in PB<br>- Event before the end of study<br>- LGD value of ≥1.5 times EFS of control group | 2               |    |
| Stable Disease               | SD                  | - HuCD45 <sup>+</sup> never drops below 1%<br>- No event before the end of study period                                               | 4               |    |
| Partial Response             | PR                  | - HuCD45 <sup>+</sup> below 1% for one week only                                                                                      | 6               |    |
| Complete Response            | CR                  | - HuCD45 <sup>+</sup> below 1% for two consecutive weeks                                                                              | 8               |   |
| Maintained Complete Response | MCR                 | - HuCD45 <sup>+</sup> below 1% for the last three weeks of study                                                                      | 10              |  |

**Supplementary Table S2. Details of known chromosomal translocations in the xenograft panel.**

| <b>ALL lineage</b> | <b>Xenograft ]</b> | <b>Known Chromosomal Abnormalities</b>                            |
|--------------------|--------------------|-------------------------------------------------------------------|
| <b>MLL-ALL</b>     | MLL-1              | t(1;11)                                                           |
|                    | MLL-2              | t(4;11)                                                           |
|                    | MLL-3              | t(11;17)                                                          |
|                    | MLL-5              | t(10;11)                                                          |
|                    | MLL-6              | t(11;19)                                                          |
|                    | MLL-7              | t(4;11)                                                           |
|                    | MLL-8              | <i>MLL</i> -Rearranged                                            |
|                    | MLL-14             | Complex t(11;19)                                                  |
|                    | ALL-3              | t(11;19)                                                          |
| <b>BCP-ALL</b>     | ALL-4              | t(9;22) BCR-ABL                                                   |
|                    | ALL-7              | t(17;19)(q21;q13)                                                 |
|                    | ALL-11             | del(12)(p13) del(13)(q12)                                         |
| <b>T-ALL</b>       | ALL-31             | del(6)(q21),del(11)(q23)[4]/46,XY[14]                             |
|                    | ALL-33             | t(11;14)(p13;q32)[11]/46,idem,t(1;8;9)(q32.1;p21;p22)[8]/46,XY[1] |

**Supplementary Table S3. Top 100 discriminating genes for each xenograft subtype identified by microarray analysis of gene expression**

Top 100 up- and down-regulated genes (MLL-ALL specific): calculated with LimmaGP. Selection criteria: *P* value less than 0.05 and FDR less than 0.05

| <b>Gene ID</b> | <b>Expression</b> | <b>Unadjusted p-value<br/>from moderated t-test</b> | <b>FDR(BH)</b> |
|----------------|-------------------|-----------------------------------------------------|----------------|
| MEIS1          | Upregulated       | 3.24E-16                                            | 1.12E-11       |
| C10ORF140      | Upregulated       | 8.54E-16                                            | 1.48E-11       |
| LOC730417      | Upregulated       | 1.77E-13                                            | 2.04E-09       |
| CSPG4          | Upregulated       | 3.91E-13                                            | 3.39E-09       |
| LOC652226      | Upregulated       | 1.23E-12                                            | 8.54E-09       |
| CCNA1          | Upregulated       | 5.97E-12                                            | 3.45E-08       |
| VLDLR          | Upregulated       | 9.86E-12                                            | 4.79E-08       |
| LTK            | Upregulated       | 1.10E-11                                            | 4.79E-08       |
| LOC153684      | Upregulated       | 8.36E-11                                            | 2.90E-07       |
| ITPKA          | Upregulated       | 1.09E-10                                            | 3.15E-07       |
| RPS6KA4        | Upregulated       | 1.17E-10                                            | 3.15E-07       |
| CPEB2          | Upregulated       | 1.18E-10                                            | 3.15E-07       |
| THBS4          | Upregulated       | 1.34E-10                                            | 3.32E-07       |
| PLA2G4B        | Upregulated       | 2.69E-10                                            | 6.11E-07       |
| KCNG1          | Upregulated       | 3.12E-10                                            | 6.11E-07       |
| BASP1          | Upregulated       | 3.26E-10                                            | 6.11E-07       |
| SPIB           | Upregulated       | 3.26E-10                                            | 6.11E-07       |
| NMUR1          | Upregulated       | 3.52E-10                                            | 6.11E-07       |
| PLD1           | Upregulated       | 3.68E-10                                            | 6.11E-07       |
| C11ORF24       | Upregulated       | 3.70E-10                                            | 6.11E-07       |
| FBLN1          | Upregulated       | 8.89E-10                                            | 1.40E-06       |
| HTRA3          | Upregulated       | 9.51E-10                                            | 1.44E-06       |
| GREM1          | Upregulated       | 1.04E-09                                            | 1.51E-06       |
| RTN4R          | Upregulated       | 1.20E-09                                            | 1.66E-06       |
| C20ORF103      | Upregulated       | 1.49E-09                                            | 1.87E-06       |
| SPATA6         | Upregulated       | 1.51E-09                                            | 1.87E-06       |
| SERINC2        | Upregulated       | 1.69E-09                                            | 2.02E-06       |
| ZCCHC5         | Upregulated       | 2.37E-09                                            | 2.66E-06       |
| C16ORF74       | Upregulated       | 2.74E-09                                            | 2.97E-06       |
| TBC1D8         | Upregulated       | 3.03E-09                                            | 3.19E-06       |
| M160           | Upregulated       | 3.92E-09                                            | 4.00E-06       |
| KLRAQ1         | Upregulated       | 5.20E-09                                            | 5.15E-06       |
| VAT1L          | Upregulated       | 5.42E-09                                            | 5.22E-06       |
| CD163L1        | Upregulated       | 5.59E-09                                            | 5.24E-06       |
| CDH11          | Upregulated       | 7.44E-09                                            | 6.50E-06       |
| GAS2L3         | Upregulated       | 7.49E-09                                            | 6.50E-06       |
| C16ORF93       | Upregulated       | 8.41E-09                                            | 7.12E-06       |
| CEBPA          | Upregulated       | 1.12E-08                                            | 8.66E-06       |

|              |             |          |          |
|--------------|-------------|----------|----------|
| HS.201858    | Upregulated | 1.12E-08 | 8.66E-06 |
| SCARNA5      | Upregulated | 1.19E-08 | 8.84E-06 |
| HS.362932    | Upregulated | 1.20E-08 | 8.84E-06 |
| LOC728175    | Upregulated | 1.36E-08 | 9.72E-06 |
| CD72         | Upregulated | 1.56E-08 | 1.06E-05 |
| FLJ35024     | Upregulated | 1.82E-08 | 1.21E-05 |
| HS.549989    | Upregulated | 1.87E-08 | 1.23E-05 |
| TUBB6        | Upregulated | 2.26E-08 | 1.43E-05 |
| TBC1D24      | Upregulated | 2.37E-08 | 1.47E-05 |
| PLEKHG3      | Upregulated | 2.42E-08 | 1.47E-05 |
| LOC388312    | Upregulated | 2.97E-08 | 1.77E-05 |
| TXNDC5       | Upregulated | 3.13E-08 | 1.84E-05 |
| LOC100128163 | Upregulated | 3.31E-08 | 1.91E-05 |
| IGF2BP2      | Upregulated | 3.51E-08 | 1.99E-05 |
| DAD1L        | Upregulated | 3.79E-08 | 2.09E-05 |
| PARVB        | Upregulated | 4.94E-08 | 2.59E-05 |
| DERL3        | Upregulated | 4.94E-08 | 2.59E-05 |
| REEP3        | Upregulated | 5.24E-08 | 2.67E-05 |
| PRNP         | Upregulated | 5.31E-08 | 2.67E-05 |
| FLT3         | Upregulated | 5.52E-08 | 2.72E-05 |
| NLRP3        | Upregulated | 5.56E-08 | 2.72E-05 |
| LILRB4       | Upregulated | 6.70E-08 | 3.23E-05 |
| FLJ12355     | Upregulated | 7.09E-08 | 3.36E-05 |
| JMJD7        | Upregulated | 7.51E-08 | 3.48E-05 |
| CACNA2D4     | Upregulated | 9.47E-08 | 4.25E-05 |
| PWWP2        | Upregulated | 9.60E-08 | 4.25E-05 |
| FCRLB        | Upregulated | 1.05E-07 | 4.50E-05 |
| PAN3         | Upregulated | 1.07E-07 | 4.52E-05 |
| LOC100129186 | Upregulated | 1.10E-07 | 4.60E-05 |
| C9ORF21      | Upregulated | 1.15E-07 | 4.75E-05 |
| CD151        | Upregulated | 1.21E-07 | 4.96E-05 |
| PCDHGA5      | Upregulated | 1.29E-07 | 5.16E-05 |
| TP53INP2     | Upregulated | 1.36E-07 | 5.32E-05 |
| CIB3         | Upregulated | 1.47E-07 | 5.65E-05 |
| EHD4         | Upregulated | 1.54E-07 | 5.87E-05 |
| LOC730077    | Upregulated | 1.59E-07 | 5.99E-05 |
| TRAF1        | Upregulated | 1.61E-07 | 5.99E-05 |
| LOC100130869 | Upregulated | 1.70E-07 | 6.20E-05 |
| LOC100128139 | Upregulated | 1.75E-07 | 6.33E-05 |
| ACTA2        | Upregulated | 1.81E-07 | 6.42E-05 |
| TAPT1        | Upregulated | 1.81E-07 | 6.42E-05 |
| MGC24125     | Upregulated | 1.94E-07 | 6.74E-05 |
| SERPINB8     | Upregulated | 2.06E-07 | 7.09E-05 |
| FLJ39653     | Upregulated | 2.55E-07 | 8.60E-05 |

|           |               |          |             |
|-----------|---------------|----------|-------------|
| CERCAM    | Upregulated   | 2.60E-07 | 8.67E-05    |
| BRE       | Upregulated   | 2.66E-07 | 8.78E-05    |
| DEPDC7    | Upregulated   | 2.79E-07 | 8.94E-05    |
| APOBEC3B  | Upregulated   | 2.81E-07 | 8.94E-05    |
| UBXN11    | Upregulated   | 2.96E-07 | 9.33E-05    |
| HS.335525 | Upregulated   | 3.04E-07 | 9.51E-05    |
| CA5B      | Upregulated   | 3.07E-07 | 9.51E-05    |
| STON1     | Upregulated   | 3.28E-07 | 9.98E-05    |
| ZDHHC14   | Upregulated   | 3.29E-07 | 9.98E-05    |
| SH3BP1    | Upregulated   | 3.32E-07 | 9.98E-05    |
| AGTRAP    | Upregulated   | 3.41E-07 | 0.000101148 |
| P2RX7     | Upregulated   | 3.52E-07 | 0.000102671 |
| FCRLA     | Upregulated   | 3.55E-07 | 0.000102671 |
| LDLRAP1   | Upregulated   | 3.55E-07 | 0.000102671 |
| CATSPER1  | Upregulated   | 3.82E-07 | 0.000109388 |
| SH3PXD2B  | Upregulated   | 4.37E-07 | 0.000122186 |
| FAM176B   | Upregulated   | 4.88E-07 | 0.000133584 |
| PANX2     | Upregulated   | 5.40E-07 | 0.000145152 |
| PWWP2B    | Upregulated   | 5.48E-07 | 0.00014599  |
| EXD2      | Downregulated | 5.07E-11 | 1.95E-07    |
| PVRIG     | Downregulated | 1.45E-09 | 1.87E-06    |
| GPR56     | Downregulated | 1.84E-09 | 2.13E-06    |
| ZNF827    | Downregulated | 5.94E-09 | 5.43E-06    |
| OCIAD2    | Downregulated | 8.93E-09 | 7.38E-06    |
| CD2AP     | Downregulated | 9.67E-09 | 7.80E-06    |
| ZNRD1     | Downregulated | 1.37E-08 | 9.72E-06    |
| GIMAP6    | Downregulated | 1.50E-08 | 1.04E-05    |
| C10ORF57  | Downregulated | 2.22E-08 | 1.42E-05    |
| C14ORF129 | Downregulated | 3.72E-08 | 2.08E-05    |
| HS.202577 | Downregulated | 4.96E-08 | 2.59E-05    |
| GBP1      | Downregulated | 5.01E-08 | 2.59E-05    |
| RYK       | Downregulated | 7.17E-08 | 3.36E-05    |
| ALS2CR4   | Downregulated | 7.66E-08 | 3.50E-05    |
| ZBTB20    | Downregulated | 9.75E-08 | 4.25E-05    |
| ABLIM1    | Downregulated | 9.81E-08 | 4.25E-05    |
| ITPR3     | Downregulated | 1.23E-07 | 4.96E-05    |
| LTB       | Downregulated | 1.36E-07 | 5.32E-05    |
| RPP21     | Downregulated | 1.64E-07 | 6.04E-05    |
| RAB23     | Downregulated | 1.88E-07 | 6.60E-05    |
| GK5       | Downregulated | 2.38E-07 | 8.10E-05    |
| MED28     | Downregulated | 2.69E-07 | 8.80E-05    |
| ZNF544    | Downregulated | 2.73E-07 | 8.84E-05    |
| ARHGAP15  | Downregulated | 3.34E-07 | 9.98E-05    |
| CD27      | Downregulated | 4.03E-07 | 0.000114648 |

|           |               |          |             |
|-----------|---------------|----------|-------------|
| C14ORF45  | Downregulated | 4.13E-07 | 0.000116496 |
| ZNF329    | Downregulated | 4.68E-07 | 0.000129934 |
| YOD1      | Downregulated | 4.89E-07 | 0.000133584 |
| C1ORF19   | Downregulated | 5.34E-07 | 0.000144832 |
| TMEM156   | Downregulated | 5.51E-07 | 0.00014599  |
| HS.372654 | Downregulated | 6.22E-07 | 0.000160985 |
| HS.193784 | Downregulated | 6.33E-07 | 0.000161357 |
| ZC3H12B   | Downregulated | 6.40E-07 | 0.000162083 |
| MOCS2     | Downregulated | 6.75E-07 | 0.000167173 |
| PAQR3     | Downregulated | 7.33E-07 | 0.000180328 |
| RASA2     | Downregulated | 7.58E-07 | 0.000185123 |
| GXYLT1    | Downregulated | 8.27E-07 | 0.000197796 |
| ZMYM2     | Downregulated | 8.54E-07 | 0.000202997 |
| FLJ23584  | Downregulated | 8.90E-07 | 0.000208931 |
| SPAG16    | Downregulated | 9.21E-07 | 0.000213114 |
| ARMCX2    | Downregulated | 1.08E-06 | 0.000239751 |
| SCAPER    | Downregulated | 1.13E-06 | 0.000248229 |
| ACBD7     | Downregulated | 1.19E-06 | 0.00025742  |
| CHMP2B    | Downregulated | 1.20E-06 | 0.00025764  |
| ARRDC3    | Downregulated | 1.29E-06 | 0.000270566 |
| ZNF776    | Downregulated | 1.31E-06 | 0.000273114 |
| TSPAN7    | Downregulated | 1.32E-06 | 0.000273124 |
| KLHL12    | Downregulated | 1.36E-06 | 0.000280086 |
| FZD6      | Downregulated | 1.39E-06 | 0.000283114 |
| MTMR15    | Downregulated | 1.48E-06 | 0.000297459 |
| CTHRC1    | Downregulated | 1.53E-06 | 0.000305704 |
| AMZ2      | Downregulated | 1.90E-06 | 0.000363297 |
| ZNF606    | Downregulated | 2.05E-06 | 0.000380055 |
| GSPT2     | Downregulated | 2.09E-06 | 0.000381857 |
| RBM33     | Downregulated | 2.43E-06 | 0.000430548 |
| MBIP      | Downregulated | 2.65E-06 | 0.000461982 |
| MLL       | Downregulated | 2.67E-06 | 0.000463676 |
| MGC29506  | Downregulated | 2.75E-06 | 0.000468326 |
| PIK3R3    | Downregulated | 2.75E-06 | 0.000468326 |
| DGKA      | Downregulated | 2.88E-06 | 0.000480802 |
| FAM117B   | Downregulated | 2.91E-06 | 0.000483238 |
| CASD1     | Downregulated | 3.06E-06 | 0.00050573  |
| STAT5B    | Downregulated | 3.20E-06 | 0.000516678 |
| CRY1      | Downregulated | 3.22E-06 | 0.000516678 |
| ICAM3     | Downregulated | 3.25E-06 | 0.000519401 |
| LNX2      | Downregulated | 3.36E-06 | 0.000531838 |
| MAGEE1    | Downregulated | 4.14E-06 | 0.00062479  |
| TIGD2     | Downregulated | 4.36E-06 | 0.000644606 |
| GCLM      | Downregulated | 4.53E-06 | 0.000649445 |

|           |               |          |             |
|-----------|---------------|----------|-------------|
| SUMO2     | Downregulated | 4.62E-06 | 0.000658257 |
| ZNF256    | Downregulated | 5.05E-06 | 0.000708826 |
| ZKSCAN5   | Downregulated | 5.11E-06 | 0.000711624 |
| HS.436879 | Downregulated | 5.30E-06 | 0.000731962 |
| ZDHHC23   | Downregulated | 5.51E-06 | 0.000745208 |
| PARD3     | Downregulated | 5.54E-06 | 0.000745208 |
| FBXO21    | Downregulated | 5.72E-06 | 0.000765619 |
| ZSCAN18   | Downregulated | 6.07E-06 | 0.000800486 |
| TM7SF2    | Downregulated | 6.51E-06 | 0.000849335 |
| ZNF254    | Downregulated | 6.58E-06 | 0.000854752 |
| SLC46A3   | Downregulated | 6.74E-06 | 0.000865946 |
| CD247     | Downregulated | 6.85E-06 | 0.000874084 |
| ARAP2     | Downregulated | 7.56E-06 | 0.000943081 |
| PLCH1     | Downregulated | 8.04E-06 | 0.000986068 |
| C7ORF44   | Downregulated | 8.11E-06 | 0.000986855 |
| NET1      | Downregulated | 8.41E-06 | 0.001004032 |
| C5ORF53   | Downregulated | 8.51E-06 | 0.001007948 |
| USP38     | Downregulated | 8.88E-06 | 0.001047329 |
| MRFAP1L1  | Downregulated | 8.95E-06 | 0.001052602 |
| PLCG1     | Downregulated | 9.60E-06 | 0.001113858 |
| ATP6V1G2  | Downregulated | 1.03E-05 | 0.001161025 |
| LMAN1     | Downregulated | 1.05E-05 | 0.001188103 |
| CNN3      | Downregulated | 1.11E-05 | 0.00124501  |
| GOLGA8B   | Downregulated | 1.20E-05 | 0.001320749 |
| TRIM37    | Downregulated | 1.20E-05 | 0.001320749 |
| GRK5      | Downregulated | 1.21E-05 | 0.001328226 |
| C6ORF125  | Downregulated | 1.23E-05 | 0.001340874 |
| NCK1      | Downregulated | 1.29E-05 | 0.001374926 |
| BEX4      | Downregulated | 1.29E-05 | 0.001374926 |
| PELO      | Downregulated | 1.30E-05 | 0.001378652 |
| PECAM1    | Downregulated | 1.31E-05 | 0.001386144 |
| ZFYVE20   | Downregulated | 1.34E-05 | 0.001410124 |

Top 100 up- and down-regulated genes (BCP-ALL specific): calculated with LimmaGP.  
 Selection criteria: *P* value less than 0.05 and FDR less than 0.05

| <b>Gene ID</b> | <b>Expression</b> | <b>Unadjusted p-value from<br/>moderated t-test</b> | <b>FDR(BH)</b> |
|----------------|-------------------|-----------------------------------------------------|----------------|
| LARGE          | Upregulated       | 5.70E-14                                            | 1.98E-09       |
| MME            | Upregulated       | 2.19E-13                                            | 3.80E-09       |
| PCDH18         | Upregulated       | 1.82E-12                                            | 2.10E-08       |
| GRIK5          | Upregulated       | 4.74E-12                                            | 3.62E-08       |
| ODZ4           | Upregulated       | 5.22E-12                                            | 3.62E-08       |
| MAML2          | Upregulated       | 1.11E-11                                            | 6.39E-08       |
| SH2D4B         | Upregulated       | 3.03E-11                                            | 1.37E-07       |
| LOC440030      | Upregulated       | 3.16E-11                                            | 1.37E-07       |
| ELK3           | Upregulated       | 3.73E-11                                            | 1.41E-07       |
| SGCE           | Upregulated       | 4.07E-11                                            | 1.41E-07       |
| ALOX5          | Upregulated       | 9.91E-11                                            | 3.13E-07       |
| C10ORF10       | Upregulated       | 1.13E-10                                            | 3.27E-07       |
| HS.197670      | Upregulated       | 2.57E-10                                            | 6.87E-07       |
| CYBB           | Upregulated       | 4.13E-10                                            | 1.02E-06       |
| GAB1           | Upregulated       | 5.97E-10                                            | 1.38E-06       |
| MSMP           | Upregulated       | 9.70E-10                                            | 2.10E-06       |
| HPS4           | Upregulated       | 1.37E-09                                            | 2.79E-06       |
| SRRD           | Upregulated       | 1.89E-09                                            | 3.65E-06       |
| LOC54103       | Upregulated       | 2.11E-09                                            | 3.86E-06       |
| PION           | Upregulated       | 2.38E-09                                            | 4.12E-06       |
| TTC21A         | Upregulated       | 3.03E-09                                            | 4.79E-06       |
| LZTS2          | Upregulated       | 4.34E-09                                            | 6.55E-06       |
| NAV1           | Upregulated       | 5.16E-09                                            | 7.46E-06       |
| EGLN1          | Upregulated       | 8.98E-09                                            | 1.25E-05       |
| HS.151692      | Upregulated       | 9.66E-09                                            | 1.25E-05       |
| CBLN3          | Upregulated       | 9.74E-09                                            | 1.25E-05       |
| CORO2B         | Upregulated       | 1.27E-08                                            | 1.57E-05       |
| TBC1D9         | Upregulated       | 1.54E-08                                            | 1.84E-05       |
| ID3            | Upregulated       | 1.61E-08                                            | 1.86E-05       |
| PLEKHG4B       | Upregulated       | 2.14E-08                                            | 2.39E-05       |
| CAMSAP1L1      | Upregulated       | 2.78E-08                                            | 3.01E-05       |
| ARHGEF5        | Upregulated       | 3.25E-08                                            | 3.41E-05       |
| ECM2           | Upregulated       | 3.57E-08                                            | 3.65E-05       |
| MYO5C          | Upregulated       | 3.91E-08                                            | 3.88E-05       |
| POU4F1         | Upregulated       | 5.34E-08                                            | 5.12E-05       |
| INO80          | Upregulated       | 5.88E-08                                            | 5.37E-05       |
| LOC645993      | Upregulated       | 6.94E-08                                            | 6.17E-05       |
| LOC643888      | Upregulated       | 7.19E-08                                            | 6.23E-05       |
| FOXO1          | Upregulated       | 7.52E-08                                            | 6.36E-05       |
| HRK            | Upregulated       | 9.03E-08                                            | 7.46E-05       |



|              |             |          |             |
|--------------|-------------|----------|-------------|
| LOC643002    | Upregulated | 9.28E-08 | 7.48E-05    |
| GNG7         | Upregulated | 1.01E-07 | 7.97E-05    |
| ELFN2        | Upregulated | 1.07E-07 | 8.22E-05    |
| LOC401074    | Upregulated | 1.14E-07 | 8.56E-05    |
| IFI16        | Upregulated | 1.23E-07 | 9.05E-05    |
| OSBPL10      | Upregulated | 1.33E-07 | 9.45E-05    |
| FAM19A1      | Upregulated | 1.49E-07 | 0.000103583 |
| SLC35E3      | Upregulated | 1.52E-07 | 0.000103644 |
| RAI14        | Upregulated | 1.57E-07 | 0.000104407 |
| HMX2         | Upregulated | 1.61E-07 | 0.000104407 |
| SPTA1        | Upregulated | 1.63E-07 | 0.000104407 |
| LGR5         | Upregulated | 2.71E-07 | 0.000170931 |
| HS.370872    | Upregulated | 2.94E-07 | 0.000182107 |
| MS4A1        | Upregulated | 3.35E-07 | 0.000202258 |
| MYRIP        | Upregulated | 3.38E-07 | 0.000202258 |
| TCF4         | Upregulated | 4.07E-07 | 0.000234822 |
| DIP2C        | Upregulated | 4.18E-07 | 0.000234822 |
| LOC100130506 | Upregulated | 4.24E-07 | 0.000234822 |
| GIMAP4       | Upregulated | 4.54E-07 | 0.000242083 |
| RHPN2        | Upregulated | 4.83E-07 | 0.000253635 |
| NLRP12       | Upregulated | 4.90E-07 | 0.000253898 |
| TCL6         | Upregulated | 5.19E-07 | 0.00026486  |
| ITPR1        | Upregulated | 5.58E-07 | 0.000280455 |
| CEACAM6      | Upregulated | 6.07E-07 | 0.000296539 |
| APBB1IP      | Upregulated | 6.16E-07 | 0.000296805 |
| LOC654113    | Upregulated | 6.68E-07 | 0.000317681 |
| LOC100128757 | Upregulated | 7.30E-07 | 0.000342168 |
| ZNF821       | Upregulated | 7.53E-07 | 0.000348261 |
| SEMA6C       | Upregulated | 8.23E-07 | 0.000375862 |
| LOC651647    | Upregulated | 8.49E-07 | 0.000377414 |
| LDOC1        | Upregulated | 9.04E-07 | 0.000396909 |
| CMTM8        | Upregulated | 9.22E-07 | 0.000399806 |
| RIMKLB       | Upregulated | 9.40E-07 | 0.000400529 |
| LOC649864    | Upregulated | 1.04E-06 | 0.000435087 |
| LEMD3        | Upregulated | 1.05E-06 | 0.000435087 |
| ST3GAL6      | Upregulated | 1.15E-06 | 0.000469162 |
| EIF2AK3      | Upregulated | 1.27E-06 | 0.000514248 |
| ZNF311       | Upregulated | 1.36E-06 | 0.000540058 |
| ENAH         | Upregulated | 1.37E-06 | 0.000540058 |
| OR2A9P       | Upregulated | 1.40E-06 | 0.000544914 |
| INTS3        | Upregulated | 1.41E-06 | 0.000545083 |
| MC1R         | Upregulated | 1.48E-06 | 0.00056392  |
| ZNF608       | Upregulated | 1.63E-06 | 0.000612876 |
| ZKSCAN4      | Upregulated | 1.68E-06 | 0.000618784 |

|           |               |          |             |
|-----------|---------------|----------|-------------|
| GRB7      | Upregulated   | 1.72E-06 | 0.000628611 |
| BACH2     | Upregulated   | 1.74E-06 | 0.000628667 |
| SBF2      | Upregulated   | 1.81E-06 | 0.000646614 |
| PEG10     | Upregulated   | 1.87E-06 | 0.000661596 |
| SLC26A4   | Upregulated   | 2.16E-06 | 0.000740864 |
| CCDC121   | Upregulated   | 2.16E-06 | 0.000740864 |
| S100A13   | Upregulated   | 2.30E-06 | 0.000782396 |
| SERPINB9  | Upregulated   | 2.59E-06 | 0.000846882 |
| RCBTB1    | Upregulated   | 2.63E-06 | 0.000851613 |
| WFS1      | Upregulated   | 2.84E-06 | 0.000912213 |
| AOX2P     | Upregulated   | 2.99E-06 | 0.000950555 |
| SLC16A14  | Upregulated   | 3.05E-06 | 0.000962169 |
| LTBP2     | Upregulated   | 3.16E-06 | 0.000988527 |
| ZSCAN12   | Upregulated   | 3.74E-06 | 0.001157897 |
| CHD7      | Upregulated   | 3.81E-06 | 0.001170646 |
| CRIM1     | Upregulated   | 4.05E-06 | 0.001232402 |
| CKMT2     | Upregulated   | 4.16E-06 | 0.001245554 |
| NUCB2     | Downregulated | 2.92E-09 | 4.79E-06    |
| MTX2      | Downregulated | 5.46E-08 | 5.12E-05    |
| BTG3      | Downregulated | 1.28E-07 | 9.22E-05    |
| CTSC      | Downregulated | 3.72E-07 | 0.000218843 |
| MGC4677   | Downregulated | 4.26E-07 | 0.000234822 |
| TRIM66    | Downregulated | 4.40E-07 | 0.000238521 |
| LOC442597 | Downregulated | 5.69E-07 | 0.000282251 |
| ANXA6     | Downregulated | 8.34E-07 | 0.000375927 |
| IL2RG     | Downregulated | 9.47E-07 | 0.000400529 |
| CECR1     | Downregulated | 1.64E-06 | 0.000612876 |
| LOC284422 | Downregulated | 2.05E-06 | 0.000718344 |
| CHST12    | Downregulated | 2.36E-06 | 0.000795501 |
| ZDHHC4    | Downregulated | 2.45E-06 | 0.000817377 |
| TMSB15A   | Downregulated | 2.53E-06 | 0.000836647 |
| DHRS7     | Downregulated | 5.65E-06 | 0.001594068 |
| OSBPL5    | Downregulated | 5.79E-06 | 0.001606709 |
| TBC1D2B   | Downregulated | 5.98E-06 | 0.001618293 |
| TMEM71    | Downregulated | 7.79E-06 | 0.001889662 |
| ARL8B     | Downregulated | 7.90E-06 | 0.001889662 |
| ARHGEF3   | Downregulated | 8.10E-06 | 0.001925156 |
| HS.569162 | Downregulated | 9.72E-06 | 0.002248058 |
| ZFAND2B   | Downregulated | 1.14E-05 | 0.002544035 |
| PIP4K2A   | Downregulated | 1.43E-05 | 0.003062939 |
| LOC643035 | Downregulated | 1.69E-05 | 0.003458364 |
| C20ORF100 | Downregulated | 1.72E-05 | 0.003466129 |
| CAPG      | Downregulated | 1.93E-05 | 0.003758139 |
| TRPV2     | Downregulated | 1.94E-05 | 0.003761128 |

|              |               |             |             |
|--------------|---------------|-------------|-------------|
| SIGIRR       | Downregulated | 2.22E-05    | 0.004126678 |
| UBL7         | Downregulated | 2.40E-05    | 0.004351804 |
| ANKRD33      | Downregulated | 2.54E-05    | 0.004511105 |
| CTSD         | Downregulated | 2.71E-05    | 0.004664718 |
| COMMD1       | Downregulated | 3.40E-05    | 0.005456284 |
| LOC100130291 | Downregulated | 4.01E-05    | 0.006100822 |
| SLC9A3R1     | Downregulated | 4.11E-05    | 0.006147663 |
| PFKP         | Downregulated | 4.16E-05    | 0.006194037 |
| RAB37        | Downregulated | 4.42E-05    | 0.006441318 |
| NCRNA00152   | Downregulated | 4.47E-05    | 0.006490674 |
| LOC728969    | Downregulated | 4.49E-05    | 0.006496993 |
| CD96         | Downregulated | 4.57E-05    | 0.006577918 |
| NUDT2        | Downregulated | 4.72E-05    | 0.006703517 |
| HS.57079     | Downregulated | 5.72E-05    | 0.007847191 |
| SRD5A3       | Downregulated | 5.89E-05    | 0.007920798 |
| CSGALNACT2   | Downregulated | 5.93E-05    | 0.007920798 |
| ICAM2        | Downregulated | 6.13E-05    | 0.008031425 |
| FAH          | Downregulated | 6.42E-05    | 0.00824887  |
| HCST         | Downregulated | 6.78E-05    | 0.00860183  |
| PLEKHA9      | Downregulated | 6.79E-05    | 0.00860183  |
| LOC100127983 | Downregulated | 6.87E-05    | 0.008616344 |
| LDOC1L       | Downregulated | 6.92E-05    | 0.008634214 |
| KIAA0182     | Downregulated | 7.20E-05    | 0.008919127 |
| MINPP1       | Downregulated | 7.49E-05    | 0.009252712 |
| FDFT1        | Downregulated | 8.42E-05    | 0.010034022 |
| PXMP3        | Downregulated | 8.70E-05    | 0.010300337 |
| PTTG1IP      | Downregulated | 9.27E-05    | 0.010886402 |
| FAS          | Downregulated | 0.000103351 | 0.011812466 |
| ARL4C        | Downregulated | 0.000103505 | 0.011812466 |
| ANXA1        | Downregulated | 0.000106635 | 0.01196698  |
| CPT1A        | Downregulated | 0.000107618 | 0.01196698  |
| SQLE         | Downregulated | 0.000111049 | 0.012269841 |
| KCNK17       | Downregulated | 0.000123944 | 0.013271936 |
| SLC11A2      | Downregulated | 0.000143851 | 0.014897824 |
| SEMA4D       | Downregulated | 0.000152437 | 0.015558398 |
| IL27RA       | Downregulated | 0.000152472 | 0.015558398 |
| LOC648189    | Downregulated | 0.000161031 | 0.016235814 |
| NSMAF        | Downregulated | 0.00016145  | 0.016235814 |
| TBXAS1       | Downregulated | 0.000168402 | 0.016740776 |
| TESC         | Downregulated | 0.000170917 | 0.016912285 |
| TMEM170B     | Downregulated | 0.000174864 | 0.017089429 |
| CD84         | Downregulated | 0.000178785 | 0.017329084 |
| MYO1G        | Downregulated | 0.000179364 | 0.017329084 |
| HINT2        | Downregulated | 0.000179814 | 0.017329084 |

|              |               |             |             |
|--------------|---------------|-------------|-------------|
| ITGAL        | Downregulated | 0.000189584 | 0.01788126  |
| SLC35C2      | Downregulated | 0.00019739  | 0.018463162 |
| LOC646674    | Downregulated | 0.000198242 | 0.018463162 |
| ATP1B1       | Downregulated | 0.000198259 | 0.018463162 |
| SYNJ2        | Downregulated | 0.0001985   | 0.018463162 |
| TOX2         | Downregulated | 0.000210802 | 0.019246265 |
| SLA          | Downregulated | 0.000221429 | 0.019921121 |
| LOC731042    | Downregulated | 0.00024944  | 0.021420992 |
| SEPW1        | Downregulated | 0.000251421 | 0.021436248 |
| SYNC1        | Downregulated | 0.000259115 | 0.021872798 |
| LDHA         | Downregulated | 0.000260444 | 0.021931623 |
| SLC45A4      | Downregulated | 0.000261584 | 0.021974294 |
| LOC653752    | Downregulated | 0.000265891 | 0.022067213 |
| AADAT        | Downregulated | 0.000267163 | 0.022067213 |
| IPP          | Downregulated | 0.000283531 | 0.022870054 |
| SSBP3        | Downregulated | 0.00030249  | 0.023871345 |
| DNMT3B       | Downregulated | 0.000303889 | 0.023871345 |
| TM2D3        | Downregulated | 0.000312828 | 0.024225998 |
| SLC25A20     | Downregulated | 0.000323563 | 0.024718689 |
| LOC642513    | Downregulated | 0.000330382 | 0.025081584 |
| LOC100130503 | Downregulated | 0.000331867 | 0.02513926  |
| FLJ45337     | Downregulated | 0.000336462 | 0.025266722 |
| KLHL23       | Downregulated | 0.000345136 | 0.025695629 |
| IRX5         | Downregulated | 0.000369223 | 0.026854971 |
| IQGAP2       | Downregulated | 0.000373058 | 0.026964332 |
| FHOD1        | Downregulated | 0.000388577 | 0.027774751 |
| CD7          | Downregulated | 0.0003961   | 0.028218284 |
| KIAA1797     | Downregulated | 0.00039784  | 0.028282742 |
| C9ORF142     | Downregulated | 0.000407872 | 0.028761578 |
| HEG1         | Downregulated | 0.000414831 | 0.029075078 |

Top 100 up- and down-regulated genes (T-ALL specific): calculated with LimmaGP. Selection criteria: *P* value less than 0.05 and FDR less than 0.05

| <b>Gene ID</b> | <b>Expression</b> | <b>Unadjusted p-value<br/>from moderated t-test</b> | <b>FDR(BH)</b> |
|----------------|-------------------|-----------------------------------------------------|----------------|
| CD3D           | Upregulated       | 4.39E-43                                            | 1.52E-38       |
| SH2D1A         | Upregulated       | 7.67E-26                                            | 4.44E-22       |
| TRAT1          | Upregulated       | 2.01E-24                                            | 6.34E-21       |
| CD3G           | Upregulated       | 2.01E-23                                            | 5.15E-20       |
| CD3E           | Upregulated       | 5.14E-21                                            | 9.54E-18       |
| RAB32          | Upregulated       | 9.23E-21                                            | 1.60E-17       |
| ITM2A          | Upregulated       | 1.04E-18                                            | 1.33E-15       |
| HS.554324      | Upregulated       | 1.48E-18                                            | 1.84E-15       |
| ITK            | Upregulated       | 7.72E-18                                            | 8.64E-15       |
| BCL11B         | Upregulated       | 1.11E-17                                            | 1.16E-14       |
| CD247          | Upregulated       | 1.57E-17                                            | 1.56E-14       |
| CD2            | Upregulated       | 2.53E-17                                            | 2.31E-14       |
| HS.572649      | Upregulated       | 2.94E-17                                            | 2.55E-14       |
| UBASH3A        | Upregulated       | 3.10E-17                                            | 2.62E-14       |
| MAL            | Upregulated       | 3.89E-17                                            | 3.22E-14       |
| PRTFDC1        | Upregulated       | 7.32E-17                                            | 5.65E-14       |
| GRAP2          | Upregulated       | 1.58E-16                                            | 1.17E-13       |
| LAT            | Upregulated       | 1.97E-16                                            | 1.43E-13       |
| SRPK2          | Upregulated       | 4.46E-16                                            | 3.04E-13       |
| KIAA0748       | Upregulated       | 1.02E-15                                            | 6.31E-13       |
| CAMK4          | Upregulated       | 1.25E-15                                            | 7.46E-13       |
| PLS1           | Upregulated       | 2.02E-15                                            | 1.19E-12       |
| BIVM           | Upregulated       | 2.32E-15                                            | 1.34E-12       |
| NGFRAP1        | Upregulated       | 5.89E-15                                            | 3.30E-12       |
| MKRN3          | Upregulated       | 7.68E-15                                            | 4.17E-12       |
| TOX            | Upregulated       | 1.62E-14                                            | 8.14E-12       |
| HHIP           | Upregulated       | 1.71E-14                                            | 8.50E-12       |
| HNRPLL         | Upregulated       | 2.62E-14                                            | 1.25E-11       |
| PRKCQ          | Upregulated       | 4.52E-14                                            | 2.09E-11       |
| HS.520349      | Upregulated       | 5.94E-14                                            | 2.63E-11       |
| CLIP4          | Upregulated       | 6.00E-14                                            | 2.63E-11       |
| RGL4           | Upregulated       | 6.57E-14                                            | 2.81E-11       |
| LOC439949      | Upregulated       | 6.96E-14                                            | 2.94E-11       |
| HS.46689       | Upregulated       | 7.43E-14                                            | 3.11E-11       |
| LCK            | Upregulated       | 1.09E-13                                            | 4.41E-11       |
| SERPINA10      | Upregulated       | 2.62E-13                                            | 9.55E-11       |
| SLAMF6         | Upregulated       | 2.85E-13                                            | 1.02E-10       |
| ANKRD20A1      | Upregulated       | 3.78E-13                                            | 1.33E-10       |
| NCK1           | Upregulated       | 3.94E-13                                            | 1.37E-10       |
| CD5            | Upregulated       | 4.36E-13                                            | 1.47E-10       |

|           |             |          |          |
|-----------|-------------|----------|----------|
| SLA2      | Upregulated | 5.22E-13 | 1.72E-10 |
| CYP4F2    | Upregulated | 5.63E-13 | 1.83E-10 |
| ACPL2     | Upregulated | 5.69E-13 | 1.83E-10 |
| AKR1C4    | Upregulated | 7.57E-13 | 2.37E-10 |
| LOC646576 | Upregulated | 8.12E-13 | 2.51E-10 |
| DNASE2    | Upregulated | 9.30E-13 | 2.76E-10 |
| LOC728431 | Upregulated | 1.17E-12 | 3.35E-10 |
| CDRT4     | Upregulated | 1.17E-12 | 3.35E-10 |
| LOC346887 | Upregulated | 1.59E-12 | 4.42E-10 |
| TMIGD2    | Upregulated | 2.16E-12 | 5.80E-10 |
| FZD6      | Upregulated | 2.66E-12 | 6.90E-10 |
| TFDP2     | Upregulated | 2.93E-12 | 7.42E-10 |
| HS.372654 | Upregulated | 3.06E-12 | 7.70E-10 |
| JAM3      | Upregulated | 3.76E-12 | 9.27E-10 |
| ENPP4     | Upregulated | 5.11E-12 | 1.23E-09 |
| DTX3      | Upregulated | 8.06E-12 | 1.90E-09 |
| CD7       | Upregulated | 8.37E-12 | 1.95E-09 |
| FRMD6     | Upregulated | 9.64E-12 | 2.22E-09 |
| GIMAP7    | Upregulated | 2.20E-11 | 4.70E-09 |
| FHL2      | Upregulated | 2.70E-11 | 5.76E-09 |
| SLC4A8    | Upregulated | 2.78E-11 | 5.81E-09 |
| HS.511723 | Upregulated | 2.79E-11 | 5.81E-09 |
| C14ORF135 | Upregulated | 2.80E-11 | 5.81E-09 |
| FAM102A   | Upregulated | 2.89E-11 | 5.96E-09 |
| LCMT1     | Upregulated | 2.99E-11 | 6.13E-09 |
| USP44     | Upregulated | 3.41E-11 | 6.91E-09 |
| RTBDN     | Upregulated | 3.89E-11 | 7.71E-09 |
| HEMGN     | Upregulated | 4.27E-11 | 8.42E-09 |
| AKR1C3    | Upregulated | 4.53E-11 | 8.69E-09 |
| CD28      | Upregulated | 4.88E-11 | 9.20E-09 |
| ZEB1      | Upregulated | 5.64E-11 | 1.05E-08 |
| TSHR      | Upregulated | 5.80E-11 | 1.08E-08 |
| IL27RA    | Upregulated | 6.24E-11 | 1.15E-08 |
| NDST3     | Upregulated | 6.27E-11 | 1.15E-08 |
| AZI2      | Upregulated | 6.58E-11 | 1.19E-08 |
| PTPN22    | Upregulated | 6.78E-11 | 1.22E-08 |
| NEIL3     | Upregulated | 7.39E-11 | 1.31E-08 |
| EXTL2     | Upregulated | 7.83E-11 | 1.38E-08 |
| LOC220930 | Upregulated | 8.33E-11 | 1.45E-08 |
| ZNF167    | Upregulated | 9.64E-11 | 1.62E-08 |
| CDH2      | Upregulated | 9.88E-11 | 1.66E-08 |
| LOC729776 | Upregulated | 1.06E-10 | 1.72E-08 |
| GATA3     | Upregulated | 1.10E-10 | 1.77E-08 |
| S1PR1     | Upregulated | 1.12E-10 | 1.78E-08 |

|              |               |          |          |
|--------------|---------------|----------|----------|
| C9ORF78      | Upregulated   | 1.14E-10 | 1.80E-08 |
| LANCL1       | Upregulated   | 1.24E-10 | 1.92E-08 |
| WBP5         | Upregulated   | 1.32E-10 | 2.04E-08 |
| ETS1         | Upregulated   | 1.56E-10 | 2.39E-08 |
| PHOSPHO2     | Upregulated   | 1.58E-10 | 2.39E-08 |
| C21ORF81     | Upregulated   | 1.58E-10 | 2.39E-08 |
| ELOVL5       | Upregulated   | 1.60E-10 | 2.40E-08 |
| TCF7         | Upregulated   | 1.60E-10 | 2.40E-08 |
| MGC26718     | Upregulated   | 1.60E-10 | 2.40E-08 |
| GALNT6       | Upregulated   | 1.68E-10 | 2.49E-08 |
| DSTN         | Upregulated   | 1.70E-10 | 2.50E-08 |
| ABCD3        | Upregulated   | 1.76E-10 | 2.56E-08 |
| PAQR3        | Upregulated   | 1.78E-10 | 2.58E-08 |
| MLLT11       | Upregulated   | 1.78E-10 | 2.58E-08 |
| ICOS         | Upregulated   | 1.81E-10 | 2.60E-08 |
| KCNK5        | Upregulated   | 1.82E-10 | 2.61E-08 |
| GIMAP6       | Upregulated   | 1.87E-10 | 2.67E-08 |
| HLA-DRA      | Downregulated | 4.61E-31 | 8.00E-27 |
| LOC730415    | Downregulated | 1.21E-29 | 1.40E-25 |
| HLA-DOA      | Downregulated | 3.52E-29 | 3.05E-25 |
| HLA-DPA1     | Downregulated | 7.18E-28 | 4.98E-24 |
| HLA-DRB6     | Downregulated | 9.53E-26 | 4.73E-22 |
| HLX          | Downregulated | 1.23E-25 | 5.32E-22 |
| HLA-DRB4     | Downregulated | 3.64E-25 | 1.40E-21 |
| HLA-DMB      | Downregulated | 5.11E-25 | 1.77E-21 |
| CD74         | Downregulated | 5.45E-24 | 1.58E-20 |
| TCL1A        | Downregulated | 2.08E-23 | 5.15E-20 |
| HLA-DMA      | Downregulated | 3.24E-23 | 7.50E-20 |
| CD19         | Downregulated | 2.82E-21 | 6.11E-18 |
| CIITA        | Downregulated | 4.32E-21 | 8.81E-18 |
| ZNF296       | Downregulated | 5.23E-21 | 9.54E-18 |
| UNC93B1      | Downregulated | 7.13E-20 | 1.18E-16 |
| LOC100133583 | Downregulated | 2.40E-19 | 3.79E-16 |
| EBF1         | Downregulated | 3.93E-19 | 5.93E-16 |
| LOC643384    | Downregulated | 4.17E-19 | 6.03E-16 |
| LRRK1        | Downregulated | 6.93E-19 | 9.62E-16 |
| IL1B         | Downregulated | 7.52E-19 | 1.00E-15 |
| HLA-DPB1     | Downregulated | 2.22E-18 | 2.65E-15 |
| LOC642073    | Downregulated | 2.84E-18 | 3.29E-15 |
| ADCY9        | Downregulated | 8.46E-18 | 9.17E-15 |
| LILRB2       | Downregulated | 1.24E-17 | 1.26E-14 |
| BANK1        | Downregulated | 1.67E-17 | 1.61E-14 |
| SNX2         | Downregulated | 2.20E-17 | 2.06E-14 |
| LOC100133678 | Downregulated | 2.62E-17 | 2.33E-14 |

|              |               |          |          |
|--------------|---------------|----------|----------|
| HLA-DQA1     | Downregulated | 4.46E-17 | 3.59E-14 |
| PTK2         | Downregulated | 5.28E-17 | 4.17E-14 |
| RHBDF2       | Downregulated | 8.26E-17 | 6.23E-14 |
| BTK          | Downregulated | 2.59E-16 | 1.83E-13 |
| P4HA2        | Downregulated | 4.07E-16 | 2.83E-13 |
| MEF2C        | Downregulated | 8.00E-16 | 5.34E-13 |
| SLC2A5       | Downregulated | 8.28E-16 | 5.42E-13 |
| LOC283340    | Downregulated | 9.64E-16 | 6.19E-13 |
| CIDEB        | Downregulated | 9.90E-16 | 6.24E-13 |
| LOC285296    | Downregulated | 1.19E-15 | 7.22E-13 |
| GPRIN1       | Downregulated | 4.01E-15 | 2.28E-12 |
| C17ORF60     | Downregulated | 6.06E-15 | 3.34E-12 |
| VPREB3       | Downregulated | 8.40E-15 | 4.49E-12 |
| PARP1        | Downregulated | 1.09E-14 | 5.74E-12 |
| CHST15       | Downregulated | 1.23E-14 | 6.39E-12 |
| PFTK1        | Downregulated | 1.60E-14 | 8.14E-12 |
| PLXNB2       | Downregulated | 1.79E-14 | 8.75E-12 |
| KLHL22       | Downregulated | 1.86E-14 | 8.95E-12 |
| IRF8         | Downregulated | 4.41E-14 | 2.07E-11 |
| LOC100130458 | Downregulated | 5.26E-14 | 2.40E-11 |
| CD72         | Downregulated | 5.59E-14 | 2.52E-11 |
| GPR132       | Downregulated | 6.09E-14 | 2.64E-11 |
| FAM129C      | Downregulated | 8.26E-14 | 3.41E-11 |
| SLC7A7       | Downregulated | 9.87E-14 | 4.03E-11 |
| LILRA2       | Downregulated | 1.18E-13 | 4.69E-11 |
| LY86         | Downregulated | 1.30E-13 | 5.12E-11 |
| NUDT16       | Downregulated | 1.62E-13 | 6.32E-11 |
| PRDX1        | Downregulated | 1.66E-13 | 6.39E-11 |
| OTUD1        | Downregulated | 1.73E-13 | 6.59E-11 |
| CD79B        | Downregulated | 1.84E-13 | 6.94E-11 |
| ZEB2         | Downregulated | 2.05E-13 | 7.65E-11 |
| LOC440864    | Downregulated | 2.61E-13 | 9.55E-11 |
| PAOX         | Downregulated | 2.75E-13 | 9.93E-11 |
| CCDC81       | Downregulated | 3.66E-13 | 1.30E-10 |
| CTGF         | Downregulated | 4.16E-13 | 1.43E-10 |
| MAP3K5       | Downregulated | 4.25E-13 | 1.44E-10 |
| PIK3AP1      | Downregulated | 4.97E-13 | 1.66E-10 |
| ADAM15       | Downregulated | 5.24E-13 | 1.72E-10 |
| C13ORF1      | Downregulated | 5.99E-13 | 1.91E-10 |
| WDFY4        | Downregulated | 6.19E-13 | 1.95E-10 |
| LOC441481    | Downregulated | 8.17E-13 | 2.51E-10 |
| SCARB1       | Downregulated | 8.58E-13 | 2.61E-10 |
| ARSD         | Downregulated | 9.06E-13 | 2.73E-10 |
| LOC255620    | Downregulated | 9.20E-13 | 2.75E-10 |



|              |               |          |          |
|--------------|---------------|----------|----------|
| MKNK2        | Downregulated | 9.68E-13 | 2.85E-10 |
| GPX1         | Downregulated | 1.17E-12 | 3.35E-10 |
| LRRC8C       | Downregulated | 1.19E-12 | 3.39E-10 |
| PTK2B        | Downregulated | 1.41E-12 | 3.99E-10 |
| CLECL1       | Downregulated | 1.54E-12 | 4.31E-10 |
| SPI1         | Downregulated | 1.63E-12 | 4.50E-10 |
| TBC1D14      | Downregulated | 1.65E-12 | 4.52E-10 |
| ADAP2        | Downregulated | 1.96E-12 | 5.32E-10 |
| LOC144481    | Downregulated | 2.18E-12 | 5.80E-10 |
| C6ORF150     | Downregulated | 2.23E-12 | 5.91E-10 |
| PLD6         | Downregulated | 2.48E-12 | 6.52E-10 |
| GALNT14      | Downregulated | 2.67E-12 | 6.90E-10 |
| SLC27A3      | Downregulated | 2.69E-12 | 6.90E-10 |
| HS.568329    | Downregulated | 2.85E-12 | 7.28E-10 |
| DENND3       | Downregulated | 3.70E-12 | 9.24E-10 |
| KMO          | Downregulated | 3.77E-12 | 9.27E-10 |
| DGKD         | Downregulated | 3.87E-12 | 9.46E-10 |
| LOC100129034 | Downregulated | 4.18E-12 | 1.01E-09 |
| BVES         | Downregulated | 5.36E-12 | 1.28E-09 |
| CDYL         | Downregulated | 7.76E-12 | 1.85E-09 |
| TOP2B        | Downregulated | 8.33E-12 | 1.95E-09 |
| C7ORF23      | Downregulated | 9.68E-12 | 2.22E-09 |
| CAP2         | Downregulated | 1.02E-11 | 2.34E-09 |
| RPS6KA1      | Downregulated | 1.19E-11 | 2.71E-09 |
| TLR6         | Downregulated | 1.24E-11 | 2.80E-09 |
| CTNNA1       | Downregulated | 1.26E-11 | 2.82E-09 |
| BCAS4        | Downregulated | 1.30E-11 | 2.88E-09 |
| CSRP2        | Downregulated | 1.35E-11 | 2.99E-09 |
| PHLPP1       | Downregulated | 1.51E-11 | 3.32E-09 |
| HBEGF        | Downregulated | 1.54E-11 | 3.37E-09 |

## Supplementary Table S4. Gene Set Enrichment Analysis (GSEA) of subtype specific genes

Top 30 genesets for MLL-ALL as analysed by GSEA

| NAME                                         | SIZE | Enrichment Score | Normalised Enrichment Score | FDR q-val |
|----------------------------------------------|------|------------------|-----------------------------|-----------|
| ROSS_LEUKEMIA_WITH_MLL_FUSIONS               | 75   | -0.807           | -3.322                      | 0.000     |
| MULLIGHAN_MLL_SIGNATURE_2_UP                 | 392  | -0.655           | -3.316                      | 0.000     |
| MULLIGHAN_MLL_SIGNATURE_1_UP                 | 359  | -0.669           | -3.290                      | 0.000     |
| ROSS_AML_WITH_MLL_FUSIONS                    | 77   | -0.743           | -3.051                      | 0.000     |
| VERHAAK_GLIOMASTOMA_NEURAL                   | 207  | -0.554           | -2.692                      | 0.000     |
| DIAZ_CHRONIC_MEYLOGENOUS_LEUKEMIA_DN         | 116  | -0.596           | -2.638                      | 0.000     |
| GAURNIER_PSMD4_TARGETS                       | 73   | -0.666           | -2.597                      | 0.000     |
| MORI_IMMATURE_B_LYMPHOCYTE_UP                | 50   | -0.703           | -2.593                      | 0.000     |
| BASSO_CD40_SIGNALING_UP                      | 101  | -0.609           | -2.590                      | 0.000     |
| VALK_AML_CLUSTER_15                          | 30   | -0.745           | -2.577                      | 0.000     |
| GESERICK_TERT_TARGETS_DN                     | 20   | -0.838           | -2.560                      | 0.000     |
| MARTENS_BOUND_BY_PML_RARA_FUSION             | 428  | -0.504           | -2.550                      | 0.000     |
| HADDAD_T_LYMPHOCYTE_AND_NK_PROGENITOR_DN     | 63   | -0.633           | -2.548                      | 0.000     |
| DIRMEIER_LMP1_RESPONSE_LATE_UP               | 55   | -0.648           | -2.533                      | 0.000     |
| VALK_AML_CLUSTER_5                           | 32   | -0.718           | -2.527                      | 0.000     |
| LI_INDUCED_T_TO_NATURAL_KILLER_UP            | 290  | -0.522           | -2.509                      | 0.000     |
| ZHANG_TLX_TARGETS_DN                         | 106  | -0.566           | -2.504                      | 0.000     |
| MCLACHLAN_DENTAL_CARIES_UP                   | 235  | -0.529           | -2.491                      | 0.000     |
| RUTELLA_RESPONSE_TO_CSF2RB_AND_IL4_DN        | 299  | -0.505           | -2.468                      | 0.000     |
| VERHAAK_AML_WITH_NPM1_MUTATED_UP             | 180  | -0.523           | -2.455                      | 0.000     |
| AMIT_SERUM_RESPONSE_40_MCF10A                | 31   | -0.692           | -2.431                      | 0.000     |
| DIRMEIER_LMP1_RESPONSE_EARLY                 | 66   | -0.627           | -2.427                      | 0.000     |
| RUTELLA_RESPONSE_TO_HGF_VS_CSF2RB_AND_IL4_UP | 392  | -0.466           | -2.415                      | 0.000     |
| PID_BCR_5PATHWAY                             | 65   | -0.628           | -2.392                      | 0.000     |
| ZHANG_TLX_TARGETS_36HR_UP                    | 215  | -0.497           | -2.386                      | 0.000     |
| GOLUB_ALL_VS_AML_DN                          | 24   | -0.777           | -2.384                      | 0.000     |
| PID_AVB3_OPN_PATHWAY                         | 31   | -0.718           | -2.382                      | 0.000     |
| UZONYI_RESPONSE_TO_LEUKOTRIENE_AND_THROMBIN  | 37   | -0.664           | -2.379                      | 0.000     |
| HAHTOLA_MYCOSIS_FUNGOIDES_CD4_UP             | 64   | -0.624           | -2.374                      | 0.000     |

Top 30 genesets for BCP-ALL as analysed by GSEA

| NAME                                        | SIZE | Enrichment Score | Normalised Enrichment Score | FDR q-val |
|---------------------------------------------|------|------------------|-----------------------------|-----------|
| HADDAD_B_LYMPHOCYTE_PROGENITOR              | 271  | -0.722           | -3.522                      | 0.000     |
| ROSS_AML_WITH_AML1_ETO_FUSION               | 71   | -0.620           | -2.552                      | 0.000     |
| KEGG_LEISHMANIA_INFECTION                   | 70   | -0.646           | -2.526                      | 0.000     |
| BOQUEST_STEM_CELL_DN                        | 207  | -0.528           | -2.391                      | 0.000     |
| ROSS_ACUTE_MYELOID_LEUKEMIA_CBF             | 77   | -0.611           | -2.377                      | 0.000     |
| SANA_RESPONSE_TO_IFNG_UP                    | 74   | -0.576           | -2.336                      | 0.000     |
| ZHAN_MULTIPLE_MYELOMA_CD2_UP                | 44   | -0.646           | -2.334                      | 0.000     |
| GRAHAM_CML QUIESCENT_VS_NORMAL QUIESCENT_DN | 47   | -0.660           | -2.328                      | 0.000     |
| KLEIN_PRIMARY EFFUSION_LYMPHOMA_DN          | 57   | -0.657           | -2.303                      | 0.000     |
| MORI_PLASMA_CELL_DN                         | 30   | -0.711           | -2.298                      | 0.000     |
| KIM_LRRC3B_TARGETS                          | 30   | -0.704           | -2.288                      | 0.000     |
| KEGG_ALLOGRAFT_REJECTION                    | 38   | -0.645           | -2.277                      | 0.000     |
| SIG_PIP3_SIGNALING_IN_B_LYMPHOCYTES         | 36   | -0.663           | -2.274                      | 0.000     |
| PID_RET_PATHWAY                             | 39   | -0.615           | -2.254                      | 0.000     |
| BASSO_CD40_SIGNALING_UP                     | 101  | -0.535           | -2.249                      | 0.000     |
| KEGG_ANTIGEN_PROCESSING_AND_PRESENTATION    | 89   | -0.577           | -2.239                      | 0.000     |
| REACTOME_RNA_POL_I_PROMOTER_OPENING         | 59   | -0.595           | -2.230                      | 0.000     |
| KEGG_GRAFT_VERSUS_HOST_DISEASE              | 42   | -0.641           | -2.229                      | 0.000     |
| ROYLANCE_BREAST_CANCER_16Q_COPY_NUMBER_UP   | 53   | -0.603           | -2.224                      | 0.001     |
| KEGG_TYPE_I_DIABETES_MELLITUS               | 44   | -0.640           | -2.208                      | 0.001     |
| KEGG_AUTOIMMUNE_THYROID_DISEASE             | 53   | -0.553           | -2.166                      | 0.001     |
| PID_BCR_5PATHWAY                            | 65   | -0.559           | -2.150                      | 0.001     |
| REACTOME_MEIOTIC_SYNAPSIS                   | 72   | -0.523           | -2.150                      | 0.001     |
| BASSO_CD40_SIGNALING_DN                     | 65   | -0.561           | -2.150                      | 0.001     |
| REACTOME_INTERFERON_GAMMA_SIGNALING         | 62   | -0.558           | -2.139                      | 0.001     |
| GAURNIER_PSMD4_TARGETS                      | 73   | -0.551           | -2.134                      | 0.001     |
| HAHTOLA_MYCOSIS_FUNGOIDES_CD4_UP            | 64   | -0.553           | -2.131                      | 0.001     |
| SIG_CD40PATHWAYMAP                          | 33   | -0.643           | -2.130                      | 0.001     |
| BOYLAN_MULTIPLE_MYELOMA_PCA3_DN             | 66   | -0.543           | -2.124                      | 0.001     |

Top 30 genesets for T-ALL as analysed by GSEA

| NAME                                              | SIZE | Enrichment Score | Normalised Enrichment Score | FDR q-val |
|---------------------------------------------------|------|------------------|-----------------------------|-----------|
| LEE_DIFFERENTIATING_T_LYMPHOCYTE                  | 180  | -0.663           | -2.825                      | 0.000     |
| BIOCARTA_STATHMIN_PATHWAY                         | 18   | -0.892           | -2.630                      | 0.000     |
| PID_CD8TCRDOWNSTREAMPATHWAY                       | 65   | -0.694           | -2.600                      | 0.000     |
| PUJANA_BRCA2_PCC_NETWORK                          | 406  | -0.561           | -2.533                      | 0.003     |
| PID_CD8TCRPATHWAY                                 | 53   | -0.733           | -2.478                      | 0.007     |
| FIGUEROA_AML_METHYLATION_CLUSTER_5_DN             | 47   | -0.699           | -2.472                      | 0.006     |
| ST_T_CELL_SIGNAL_TRANSDUCTION                     | 44   | -0.710           | -2.469                      | 0.005     |
| PID_TCR_PATHWAY                                   | 66   | -0.627           | -2.468                      | 0.004     |
| KEGG_T_CELL_RECEPTOR_SIGNALING_PATHWAY            | 108  | -0.610           | -2.462                      | 0.004     |
| FARMER_BREAST_CANCER_CLUSTER_1                    | 39   | -0.807           | -2.458                      | 0.004     |
| HERNANDEZ_MITOTIC_ARREST_BY_DOCETAXEL_2_UP        | 61   | -0.673           | -2.440                      | 0.006     |
| BIOCARTA_NO2IL12_PATHWAY                          | 17   | -0.912           | -2.396                      | 0.009     |
| BIOCARTA_IL12_PATHWAY                             | 21   | -0.874           | -2.395                      | 0.008     |
| MOREIRA_RESPONSE_TO_TSA_DN                        | 18   | -0.900           | -2.374                      | 0.010     |
| FIGUEROA_AML_METHYLATION_CLUSTER_6_DN             | 36   | -0.741           | -2.351                      | 0.012     |
| VILIMAS_NOTCH1_TARGETS_UP                         | 52   | -0.698           | -2.336                      | 0.015     |
| BIOCARTA_TOB1_PATHWAY                             | 19   | -0.830           | -2.336                      | 0.014     |
| BIOCARTA_IL17_PATHWAY                             | 15   | -0.949           | -2.325                      | 0.014     |
| HERNANDEZ_ABERRANT_MITOSIS_BY_DOCETACEL_2NM_UP    | 76   | -0.621           | -2.283                      | 0.021     |
| REACTOME_GENERATION_OF_SECOND_MESSENGER_MOLECULES | 27   | -0.723           | -2.268                      | 0.023     |
| BIOCARTA_TCR_PATHWAY                              | 44   | -0.691           | -2.267                      | 0.022     |
| LI_INDUCED_T_TO_NATURAL_KILLER_DN                 | 112  | -0.557           | -2.248                      | 0.024     |
| SCHMIDT_POR_TARGETS_IN_LIMB_BUD_UP                | 25   | -0.760           | -2.210                      | 0.030     |
| BOYLAN_MULTIPLE_MYELOMA_C_D_DN                    | 241  | -0.490           | -2.198                      | 0.031     |
| SHIPP_DLBCL_VS_FOLLICULAR_LYMPHOMA_DN             | 43   | -0.670           | -2.196                      | 0.030     |
| MULLIGHAN_MLL_SIGNATURE_1_DN                      | 231  | -0.480           | -2.182                      | 0.030     |
| REACTOME_CHOLESTEROL_BIOSYNTHESIS                 | 23   | -0.709           | -2.169                      | 0.031     |
| JAATINEN_HEMATOPOIETIC_STEM_CELL_DN               | 212  | -0.507           | -2.149                      | 0.033     |
| SASAKI_ADULT_T_CELL_LEUKEMIA                      | 170  | -0.499           | -2.142                      | 0.032     |
