# Supplementary material
Source: PubMed Central journal article supplement (PMC4154988)
Supplement: NIHMS612561-supplement-3.pdf [file NIHMS612561-supplement-3.pdf]

**Supplementary Table S5. Complete summary of *in vivo* single-agent ABT-263 responses of individual mice**

| Study information |        |                 | Animal Counts/Status |                 |                 |                 |                     | EFS Evaluation       |                  |         |                       | Response Evaluation |     |     |    |    |    |     |              |                        |    |     |
|-------------------|--------|-----------------|----------------------|-----------------|-----------------|-----------------|---------------------|----------------------|------------------|---------|-----------------------|---------------------|-----|-----|----|----|----|-----|--------------|------------------------|----|-----|
| Cell Line         | ID     | Treatment Group | N1 <sup>1</sup>      | Nd <sup>2</sup> | Ne <sup>3</sup> | Na <sup>4</sup> | No. ev <sup>5</sup> | KM med. <sup>6</sup> | Log-rank P-value | EFS T/C | Med RTV. <sup>7</sup> | PD                  | PD1 | PD2 | SD | PR | CR | MCR | Median Score | Overall Group Response |    |     |
| G1                | ALL-2  | CTRL            | 8                    | 0               | 0               | 8               | 8                   | 4.7                  | .                |         | >25                   | 8                   | 0   | 0   | 0  | 0  | 0  | 0   | 0            | 0                      | PD |     |
|                   |        | ABT-263         | 6                    | 0               | 0               | 6               | 6                   | 5.2                  | 0.45987          | 1.1     | >25                   | 0                   | 4   | 2   | 0  | 0  | 0  | 0   | 0            | 0                      | 0  | PD1 |
| G2                | ALL-3  | CTRL            | 7                    | 0               | 0               | 7               | 7                   | 9.6                  | .                |         | >25                   | 7                   | 0   | 0   | 0  | 0  | 0  | 0   | 0            | 0                      | 0  | PD  |
|                   |        | ABT-263         | 8                    | 0               | 0               | 8               | 8                   | 63.3                 | 0.00762          | 6.6     | >25                   | 0                   | 1   | 0   | 0  | 0  | 7  | 0   | 8            | 0                      | 8  | CR  |
| G3                | ALL-4  | CTRL            | 4                    | 0               | 0               | 4               | 4                   | 1.5                  | .                |         | >25                   | 4                   | 0   | 0   | 0  | 0  | 0  | 0   | 0            | 0                      | 0  | PD  |
|                   |        | ABT-263         | 6                    | 2               | 0               | 4               | 4                   | 28.6                 | 0.02857          | 18.5    | >25                   | 0                   | 0   | 4   | 0  | 0  | 0  | 0   | 0            | 2                      | 0  | PD2 |
| G4                | ALL-7  | CTRL            | 8                    | 0               | 0               | 8               | 8                   | 6.8                  | .                |         | >25                   | 8                   | 0   | 0   | 0  | 0  | 0  | 0   | 0            | 0                      | 0  | PD  |
|                   |        | ABT-263         | 8                    | 2               | 0               | 6               | 6                   | 31.4                 | 0.00033          | 4.6     | >25                   | 0                   | 0   | 0   | 0  | 0  | 6  | 0   | 8            | 0                      | 8  | CR  |
| G5                | ALL-8  | CTRL            | 8                    | 0               | 0               | 8               | 7                   | 11.8                 | .                |         | >25                   | 6                   | 0   | 0   | 0  | 1  | 0  | 1   | 0            | 0                      | 0  | PD  |
|                   |        | ABT-263         | 9                    | 0               | 0               | 9               | 9                   | 62.8                 | 0.00436          | 5.3     | >25                   | 0                   | 0   | 0   | 0  | 0  | 9  | 0   | 8            | 0                      | 8  | CR  |
| G6                | ALL-16 | CTRL            | 8                    | 0               | 0               | 8               | 8                   | 18.2                 | .                |         | >25                   | 8                   | 0   | 0   | 0  | 0  | 0  | 0   | 0            | 0                      | 0  | PD  |
|                   |        | ABT-263         | 9                    | 0               | 1               | 8               | 8                   | 85.5                 | 0.00016          | 4.7     | >25                   | 0                   | 0   | 0   | 0  | 0  | 8  | 0   | 8            | 0                      | 8  | CR  |
| G7                | ALL-17 | CTRL            | 10                   | 0               | 0               | 10              | 10                  | 2.5                  | .                |         | >25                   | 10                  | 0   | 0   | 0  | 0  | 0  | 0   | 0            | 0                      | 0  | PD  |
|                   |        | ABT-263         | 8                    | 1               | 1               | 6               | 6                   | 24.2                 | 0.00013          | 9.5     | >25                   | 0                   | 0   | 5   | 0  | 1  | 0  | 0   | 2            | 0                      | 2  | PD2 |
| G8                | ALL-19 | CTRL            | 7                    | 1               | 0               | 6               | 6                   | 5.0                  | .                |         | >25                   | 6                   | 0   | 0   | 0  | 0  | 0  | 0   | 0            | 0                      | 0  | PD  |
|                   |        | ABT-263         | 8                    | 2               | 0               | 6               | 2                   | >43                  | 0.00217          | > 8.3   | 16.3                  | 0                   | 0   | 0   | 0  | 0  | 6  | 0   | 8            | 0                      | 8  | CR  |
| G9                | ALL-10 | CTRL            | 8                    | 2               | 1               | 5               | 5                   | 7.5                  | .                |         | >25                   | 5                   | 0   | 0   | 0  | 0  | 0  | 0   | 0            | 0                      | 0  | PD  |
|                   |        | ABT-263         | 7                    | 2               | 1               | 4               | 4                   | 33.3                 | 0.00794          | 4.5     | >25                   | 0                   | 0   | 0   | 0  | 0  | 4  | 0   | 8            | 0                      | 8  | CR  |
| G10               | ALL-11 | CTRL            | 8                    | 0               | 1               | 7               | 7                   | 20.2                 | .                |         | >25                   | 7                   | 0   | 0   | 0  | 0  | 0  | 0   | 0            | 0                      | 0  | PD  |
|                   |        | ABT-263         | 8                    | 5               | 0               | 3               | 3                   | 56.3                 | 0.00833          | 2.8     | >25                   | 0                   | 0   | 0   | 0  | 0  | 3  | 0   | 8            | 0                      | 8  | CR  |
| G11               | ALL-27 | CTRL            | 7                    | 1               | 0               | 6               | 6                   | 3.3                  | .                |         | >25                   | 6                   | 0   | 0   | 0  | 0  | 0  | 0   | 0            | 0                      | 0  | PD  |
|                   |        | ABT-263         | 9                    | 0               | 0               | 9               | 9                   | 19.6                 | 0.29590          | 6.0     | >25                   | 0                   | 3   | 3   | 0  | 2  | 1  | 0   | 2            | 0                      | 2  | PD2 |
| G12               | ALL-29 | CTRL            | 8                    | 0               | 0               | 8               | 8                   | 4.4                  | .                |         | >25                   | 8                   | 0   | 0   | 0  | 0  | 0  | 0   | 0            | 0                      | 0  | PD  |
|                   |        | ABT-263         | 9                    | 2               | 0               | 7               | 7                   | 48.4                 | 0.00016          | 10.9    | >25                   | 0                   | 0   | 0   | 0  | 0  | 7  | 0   | 8            | 0                      | 8  | CR  |
| G13               | ALL-30 | CTRL            | 8                    | 0               | 0               | 8               | 8                   | 5.3                  | .                |         | >25                   | 8                   | 0   | 0   | 0  | 0  | 0  | 0   | 0            | 0                      | 0  | PD  |
|                   |        | ABT-263         | 9                    | 0               | 0               | 9               | 9                   | 16.2                 | 0.00395          | 3.1     | >25                   | 0                   | 0   | 8   | 0  | 1  | 0  | 0   | 2            | 0                      | 2  | PD2 |
| G14               | ALL-31 | CTRL            | 8                    | 0               | 0               | 8               | 8                   | 13.9                 | .                |         | >25                   | 8                   | 0   | 0   | 0  | 0  | 0  | 0   | 0            | 0                      | 0  | PD  |
|                   |        | ABT-263         | 9                    | 0               | 4               | 5               | 4                   | 91.9                 | 0.00078          | 6.6     | >25                   | 0                   | 0   | 0   | 0  | 0  | 5  | 0   | 8            | 0                      | 8  | CR  |
| G16               | ALL-32 | CTRL            | 8                    | 0               | 0               | 8               | 8                   | 6.7                  | .                |         | >25                   | 8                   | 0   | 0   | 0  | 0  | 0  | 0   | 0            | 0                      | 0  | PD  |
|                   |        | ABT-263         | 8                    | 1               | 0               | 7               | 7                   | 18.9                 | 0.00016          | 2.8     | >25                   | 0                   | 0   | 5   | 0  | 1  | 1  | 0   | 2            | 0                      | 2  | PD2 |
| G17               | ALL-33 | CTRL            | 8                    | 0               | 0               | 8               | 8                   | 6.0                  | .                |         | >25                   | 8                   | 0   | 0   | 0  | 0  | 0  | 0   | 0            | 0                      | 0  | PD  |
|                   |        | ABT-263         | 8                    | 2               | 0               | 6               | 6                   | 37.8                 | 0.00033          | 6.3     | >25                   | 0                   | 0   | 0   | 0  | 0  | 6  | 0   | 8            | 0                      | 8  | CR  |
| G37               | ALL-37 | CTRL            | 8                    | 0               | 0               | 8               | 8                   | 7.8                  | .                |         | >25                   | 8                   | 0   | 0   | 0  | 0  | 0  | 0   | 0            | 0                      | 0  | PD  |
|                   |        | ABT-263         | 8                    | 0               | 0               | 8               | 8                   | 23.8                 | 0.00016          | 3.1     | >25                   | 0                   | 0   | 1   | 0  | 7  | 0  | 0   | 6            | 0                      | 6  | PR  |
| G38               | ALL-38 | CTRL            | 8                    | 0               | 0               | 8               | 8                   | 14.2                 | .                |         | >25                   | 8                   | 0   | 0   | 0  | 0  | 0  | 0   | 0            | 0                      | 0  | PD  |
|                   |        | ABT-263         | 8                    | 0               | 0               | 8               | 8                   | 44.7                 | 0.00016          | 3.1     | >25                   | 0                   | 0   | 0   | 0  | 1  | 7  | 0   | 8            | 0                      | 8  | CR  |
| G41               | ALL-41 | CTRL            | 8                    | 0               | 0               | 8               | 8                   | 20.0                 | .                |         | >25                   | 7                   | 0   | 0   | 0  | 1  | 0  | 0   | 0            | 0                      | 0  | PD  |

|     |        |         |   |   |   |   |   |      |         |     |     |   |   |   |   |   |   |   |   |     |
|-----|--------|---------|---|---|---|---|---|------|---------|-----|-----|---|---|---|---|---|---|---|---|-----|
| G42 | ALL-42 | ABT-263 | 9 | 0 | 0 | 9 | 9 | 32.5 | 0.00021 | 1.6 | >25 | 0 | 0 | 3 | 0 | 4 | 2 | 0 | 6 | PR  |
|     |        | CTRL    | 8 | 0 | 0 | 8 | 8 | 1.9  | .       |     | >25 | 8 | 0 | 0 | 0 | 0 | 0 | 0 | 0 | 0   |
| G43 | ALL-43 | ABT-263 | 7 | 0 | 0 | 7 | 7 | 5.9  | 0.00016 | 3.2 | >25 | 0 | 0 | 7 | 0 | 0 | 0 | 0 | 2 | PD2 |
|     |        | CTRL    | 8 | 0 | 0 | 8 | 8 | 14.0 | .       |     | >25 | 8 | 0 | 0 | 0 | 0 | 0 | 0 | 0 | 0   |
| G44 | ALL-44 | ABT-263 | 8 | 0 | 0 | 8 | 8 | 43.9 | 0.00016 | 3.1 | >25 | 0 | 0 | 0 | 0 | 0 | 8 | 0 | 8 | CR  |
|     |        | CTRL    | 7 | 0 | 0 | 7 | 7 | 11.4 | .       |     | >25 | 7 | 0 | 0 | 0 | 0 | 0 | 0 | 0 | 0   |
| G47 | ALL-47 | ABT-263 | 8 | 0 | 0 | 8 | 7 | 27.2 | 0.00047 | 2.4 | >25 | 0 | 0 | 7 | 1 | 0 | 0 | 0 | 2 | PD2 |
|     |        | CTRL    | 9 | 0 | 0 | 9 | 9 | 11.9 | .       |     | >25 | 9 | 0 | 0 | 0 | 0 | 0 | 0 | 0 | 0   |
| G18 | MLL-1  | ABT-263 | 9 | 1 | 0 | 8 | 8 | 41.5 | 0.00004 | 3.5 | >25 | 0 | 0 | 0 | 0 | 0 | 8 | 0 | 8 | CR  |
|     |        | CTRL    | 8 | 0 | 0 | 8 | 8 | 19.2 | .       |     | >25 | 1 | 0 | 0 | 0 | 7 | 0 | 0 | 6 | PR  |
| G19 | MLL-2  | ABT-263 | 8 | 0 | 0 | 8 | 7 | 39.7 | 0.00031 | 2.1 | >25 | 0 | 1 | 1 | 1 | 3 | 2 | 0 | 6 | PR  |
|     |        | CTRL    | 8 | 0 | 0 | 8 | 8 | 14.8 | .       |     | >25 | 8 | 0 | 0 | 0 | 0 | 0 | 0 | 0 | 0   |
| G20 | MLL-3  | ABT-263 | 8 | 4 | 0 | 4 | 4 | 26.8 | 0.00202 | 1.8 | >25 | 0 | 0 | 0 | 0 | 4 | 0 | 0 | 6 | PR  |
|     |        | CTRL    | 8 | 0 | 0 | 8 | 8 | 8.3  | .       |     | >25 | 8 | 0 | 0 | 0 | 0 | 0 | 0 | 0 | 0   |
| G21 | MLL-5  | ABT-263 | 8 | 0 | 0 | 8 | 8 | 34.1 | 0.00016 | 4.1 | >25 | 0 | 0 | 0 | 0 | 3 | 5 | 0 | 8 | CR  |
|     |        | CTRL    | 7 | 0 | 0 | 7 | 7 | 8.7  | .       |     | >25 | 7 | 0 | 0 | 0 | 0 | 0 | 0 | 0 | 0   |
| G22 | MLL-6  | ABT-263 | 8 | 0 | 0 | 8 | 8 | 14.6 | 0.00062 | 1.7 | >25 | 0 | 2 | 6 | 0 | 0 | 0 | 0 | 2 | PD2 |
|     |        | CTRL    | 8 | 0 | 0 | 8 | 8 | 6.3  | .       |     | >25 | 8 | 0 | 0 | 0 | 0 | 0 | 0 | 0 | 0   |
| G15 | MLL-7  | ABT-263 | 8 | 0 | 0 | 8 | 8 | 29.1 | 0.00016 | 4.6 | >25 | 0 | 0 | 5 | 0 | 3 | 0 | 0 | 2 | PD2 |
|     |        | CTRL    | 8 | 0 | 0 | 8 | 8 | 12.7 | .       |     | >25 | 8 | 0 | 0 | 0 | 0 | 0 | 0 | 0 | 0   |
| G23 | MLL-8  | ABT-263 | 8 | 1 | 0 | 7 | 7 | 30.6 | 0.00016 | 2.4 | >25 | 0 | 0 | 3 | 0 | 4 | 0 | 0 | 6 | PR  |
|     |        | CTRL    | 8 | 0 | 0 | 8 | 8 | 13.7 | .       |     | >25 | 8 | 0 | 0 | 0 | 0 | 0 | 0 | 0 | 0   |
| G24 | MLL-14 | ABT-263 | 8 | 1 | 0 | 7 | 7 | 16.8 | 0.00016 | 1.2 | >25 | 0 | 5 | 2 | 0 | 0 | 0 | 0 | 0 | PD1 |
|     |        | CTRL    | 8 | 0 | 1 | 7 | 7 | 8.7  | .       |     | >25 | 7 | 0 | 0 | 0 | 0 | 0 | 0 | 0 | 0   |
|     |        | ABT-263 | 7 | 1 | 0 | 6 | 6 | 24.9 | 0.00058 | 2.9 | >25 | 0 | 0 | 5 | 0 | 0 | 1 | 0 | 2 | PD2 |

<sup>1</sup>N1 - number of mice in group

<sup>2</sup>Nd - number of mice that experienced toxic deaths

<sup>3</sup>Ne - number of additional mice excluded

<sup>4</sup>Na - number of mice analyzed

<sup>5</sup>Number of events. An event was defined as reaching  $\geq 25\%$  hCD45 cells in peripheral blood

<sup>6</sup>Kaplan-Meier estimate of median days to event. Time to event was estimated using interpolation

<sup>7</sup>Median relative tumor volume. Median %huCD45 at the end of the study

**Supplementary Table S6. Summary of the statistical analysis of correlations between *BCL2* family gene expression and *in vivo* ABT-263 responses**

|                  | Correlation with LGD* |                                |                  |                   |                  |                   |                  |                   | Non-Responder Versus Responder^ |         |         |         |
|------------------|-----------------------|--------------------------------|------------------|-------------------|------------------|-------------------|------------------|-------------------|---------------------------------|---------|---------|---------|
|                  | All MLL/B-ALL/T-ALL   |                                | MLL              |                   | BCP-ALL          |                   | T-ALL            |                   | All MLL/B-ALL/T-ALL             | MLL     | BCP-ALL | T-ALL   |
|                  | Correl Coeff (r)      | Sig of correl (p) <sup>+</sup> | Correl Coeff (r) | Sig of correl (p) | Correl Coeff (r) | Sig of correl (p) | Correl Coeff (r) | Sig of correl (p) | p-value                         | p-value | p-value | p-value |
| <b>AI</b>        | -0.12                 | 0.512                          | 0.25             | 0.512             | -0.34            | 0.46              | -0.35            | 0.204             | 0.402                           | 0.776   | 0.482   | 0.651   |
| <b>BCL2</b>      | -0.02                 | 0.92                           | 0.24             | 0.529             | 0.05             | 0.911             | 0.33             | 0.223             | 0.942                           | 0.919   | 0.634   | 0.379   |
| <b>BCL-W</b>     | -0.23                 | 0.21                           | 0.69             | 0.039             | -0.54            | 0.216             | -0.20            | 0.47              | 0.714                           | 0.242   | 0.931   | 0.338   |
| <b>MCL1</b>      | -0.43                 | 0.015                          | -0.46            | 0.21              | -0.61            | 0.149             | -0.32            | 0.24              | 0.089                           | 0.027   | 0.008   | 0.585   |
| <b>BCL-XL/XS</b> | 0.32                  | 0.083                          | 0.79             | 0.012             | 0.32             | 0.48              | -0.08            | 0.782             | 0.246                           | 0.53    | 0.142   | 0.178   |
| <b>BAK</b>       | 0.01                  | 0.941                          | 0.44             | 0.24              | 0.57             | 0.181             | -0.29            | 0.297             | 0.355                           | 0.936   | 0.193   | 0.03    |
| <b>BAX</b>       | 0.11                  | 0.574                          | 0.10             | 0.794             | 0.18             | 0.698             | 0.38             | 0.162             | 0.561                           | 0.07    | 0.524   | 0.552   |
| <b>BOK</b>       | -0.16                 | 0.405                          | -0.25            | 0.513             | -0.44            | 0.324             | -0.13            | 0.655             | 0.538                           | 0.957   | 0.819   | 0.377   |
| <b>BCLG</b>      | -0.07                 | 0.712                          | -0.29            | 0.446             | 0.29             | 0.522             | -0.16            | 0.574             | 0.314                           | 0.409   | 0.654   | 0.714   |
| <b>BFK</b>       | 0.29                  | 0.119                          | 0.03             | 0.939             | 0.67             | 0.097             | 0.35             | 0.206             | 0.698                           | 0.9     | 0.968   | 0.729   |
| <b>BAD</b>       | 0.03                  | 0.855                          | -0.21            | 0.593             | -0.20            | 0.663             | 0.06             | 0.823             | 0.145                           | 0.543   | 0.056   | 0.436   |
| <b>BID</b>       | -0.21                 | 0.255                          | -0.02            | 0.952             | 0.56             | 0.196             | -0.52            | 0.046             | 0.773                           | 0.446   | 0.061   | 0.128   |
| <b>BIK</b>       | -0.13                 | 0.483                          | 0.51             | 0.163             | 0.18             | 0.693             | -0.40            | 0.142             | 0.226                           | 0.234   | 0.739   | 0.483   |
| <b>BIM</b>       | -0.01                 | 0.959                          | -0.16            | 0.683             | 0.27             | 0.564             | 0.26             | 0.357             | 0.108                           | 0.044   | 0.185   | 0.717   |
| <b>BMF</b>       | -0.22                 | 0.239                          | -0.10            | 0.809             | 0.64             | 0.122             | -0.38            | 0.163             | 0.795                           | 0.208   | 0.841   | 0.813   |
| <b>HRK</b>       | 0.15                  | 0.407                          | 0.004            | 0.993             | 0.57             | 0.179             | 0.39             | 0.156             | 0.152                           | 0.167   | 0.005   | 0.613   |
| <b>NOXA</b>      | -0.08                 | 0.655                          | -0.33            | 0.385             | -0.03            | 0.945             | -0.05            | 0.859             | 0.616                           | 0.209   | 0.349   | 0.049   |
| <b>PUMA</b>      | -0.21                 | 0.265                          | -0.13            | 0.741             | -0.45            | 0.307             | -0.36            | 0.188             | 0.923                           | 0.556   | 0.375   | 0.647   |

\*Samples were correlated to the Leukaemia Growth Delay (LGD) of individual xenografts by Pearson correlation.

^Xenografts were considered Non-Responder if ORM<5 and Responder if ORM>5

**Supplementary Table S7. *In vivo* efficacy of combining ABT-263 with vincristine (VCR), dexamethasone (DEX) or L-asparaginase (L-ASN) against pediatric ALL xenografts.**

| Xenograft | ABT-263 | VCR  | ABT-263 + VCR | P-value (combination vs. ABT-263) | P-value (combination vs. VCR) | Therapeutic Enhancement |
|-----------|---------|------|---------------|-----------------------------------|-------------------------------|-------------------------|
|           | LGD     | LGD  | LGD           |                                   |                               |                         |
| ALL-2     | 6       | 28.1 | NE            | NE                                | NE                            | NE                      |
| ALL-19    | 35.5    | NE   | >66.8         | 0.12                              | NE                            | NE                      |
| ALL-31    | 48.8    | 22.7 | 59            | <b>&lt;0.01</b>                   | <b>&lt;0.01</b>               | Yes                     |

  

| Xenograft | ABT-263 | DEX  | ABT-263 + DEX | P-value (combination vs. ABT-263) | P-value (combination vs. DEX) | Therapeutic Enhancement |
|-----------|---------|------|---------------|-----------------------------------|-------------------------------|-------------------------|
|           | LGD     | LGD  | LGD           |                                   |                               |                         |
| ALL-2     | 6       | 12.4 | 14.8          | <b>&lt;0.01</b>                   | 0.44                          | No                      |
| ALL-19    | 35.5    | 9.8  | NE            | NE                                | NE                            | NE                      |
| ALL-31    | 48.8    | -1.5 | 46            | 0.06                              | <b>&lt;0.01</b>               | No                      |

  

| Xenograft | ABT-263 | L-ASN | ABT-263 + L-ASN | P-value (combination vs. ABT-263) | P-value (combination vs. L-ASN) | Therapeutic Enhancement |
|-----------|---------|-------|-----------------|-----------------------------------|---------------------------------|-------------------------|
|           | LGD     | LGD   | LGD             |                                   |                                 |                         |
| ALL-2     | 2.7     | 23.5  | NE              | NE                                | NE                              | NE                      |
| ALL-19    | 35.5    | 5     | 50.9            | 0.06                              | <b>0.02</b>                     | No                      |
| ALL-31    | 59.2    | 5.6   | >76.7           | <b>&lt;0.01</b>                   | <b>&lt;0.01</b>                 | Yes                     |

P-values in bold denote significantly greater EFS of the combination compared with the single agent  
 NE, not evaluable due to toxicity in >25% of the cohort



|               |    |   |   |   |   |      |          |     |      |   |   |   |   |   |   |   |   |     |
|---------------|----|---|---|---|---|------|----------|-----|------|---|---|---|---|---|---|---|---|-----|
| ABT-263+DEX   | 10 | 1 | 0 | 9 | 8 | 52.3 | 0.006469 | 8.3 | >25  | 0 | 1 | 0 | 0 | 0 | 8 | 0 | 8 | CR  |
| Control       | 8  | 0 | 0 | 8 | 8 | 9.3  | .        |     | >25  | 8 | 0 | 0 | 0 | 0 | 0 | 0 | 0 | PD  |
| ABT-263       | 8  | 0 | 1 | 7 | 7 | 68.5 | 0.000155 | 7.4 | >25  | 0 | 0 | 0 | 0 | 0 | 7 | 0 | 8 | CR  |
| L-ASN         | 8  | 0 | 0 | 8 | 8 | 14.9 | 0.000466 | 1.6 | >25  | 0 | 2 | 6 | 0 | 0 | 0 | 0 | 2 | PD2 |
| ABT-263+L-ASN | 9  | 1 | 0 | 8 | 4 | >86  | 0.000155 | >   | 21.0 | 0 | 0 | 0 | 0 | 0 | 8 | 0 | 8 | CR  |
|               |    |   |   |   |   |      |          | 9.3 |      |   |   |   |   |   |   |   |   |     |

<sup>1</sup>N1 - number of mice in group

<sup>2</sup>Nd - number of mice that experienced toxic deaths

<sup>3</sup>Ne - number of additional mice excluded

<sup>4</sup>Na - number of mice analyzed

<sup>5</sup>Number of events. An event was defined as reaching  $\geq 25\%$  hCD45 cells in peripheral blood

<sup>6</sup>Kaplan-Meier estimate of median days to event. Time to event was estimated using interpolation

<sup>7</sup>Median relative tumor volume. Median %huCD45 at the end of the study
