# Supplementary material
Source: PubMed Central journal article supplement (PMC4154988)

**Supplementary Figure S2. Responses of the remaining MLL-ALL xenografts not shown in Figure 2.** Left panels, %huCD45<sup>+</sup> of individual mice over time; right panels, proportion of mice remaining event-free. Gray lines, vehicle control; black lines, ABT-263 treated. Shaded areas indicate the treatment period.

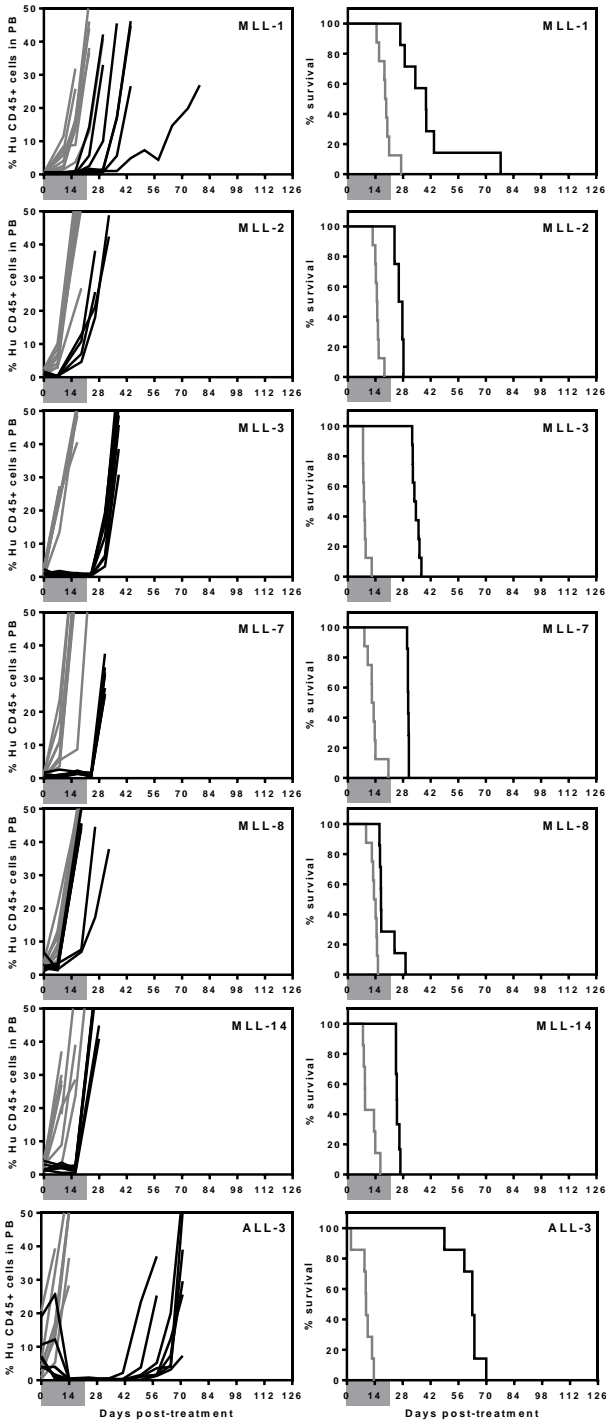

**Supplementary Figure S3. Responses of the remaining BCP-ALL xenografts not shown in Figure 2.** Left panels, %huCD45<sup>+</sup> of individual mice over time; right panels, proportion of mice remaining event-free. Gray lines, vehicle control; black lines, ABT-263 treated. Shaded areas indicate the treatment period.

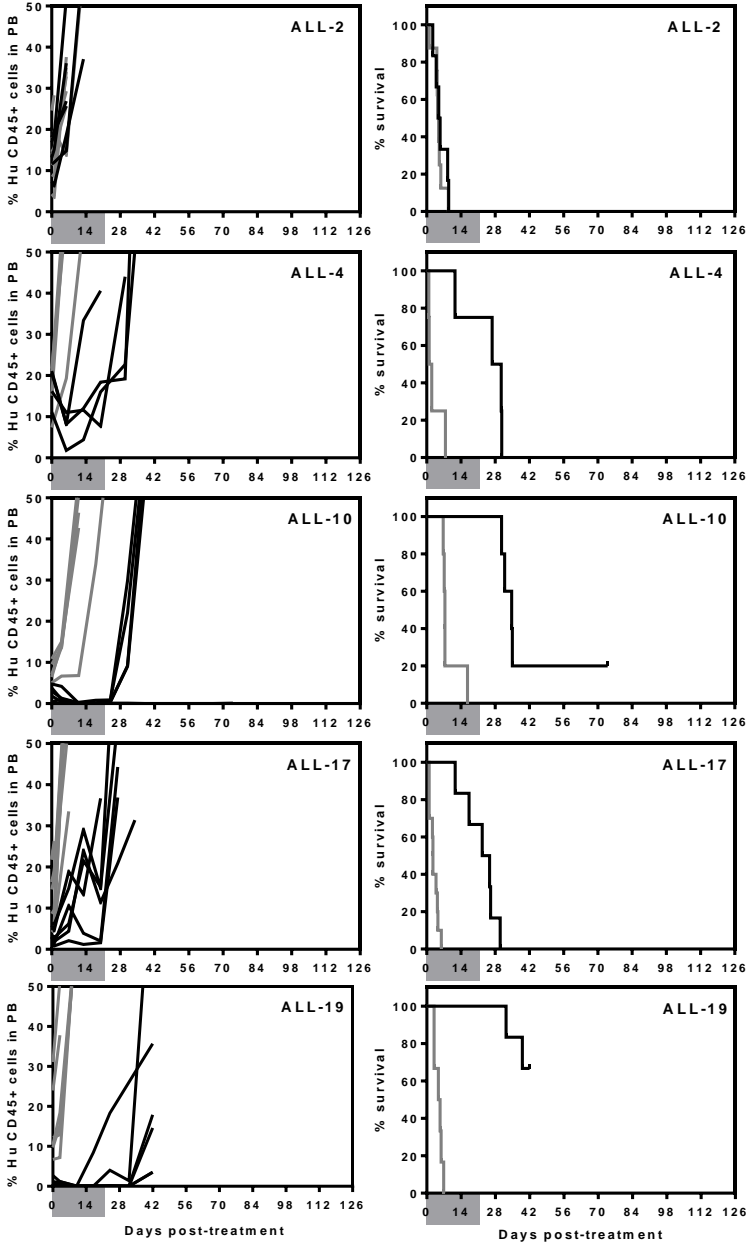

**Supplementary Figure S4. Responses of the remaining T-ALL xenografts not shown in Figure 2.** Left panels for each xenograft, %huCD45<sup>+</sup> of individual mice over time; right panels for each xenograft, proportion of mice remaining event-free. Gray lines, vehicle control; black lines, ABT-263 treated. Shaded areas indicate the treatment period.

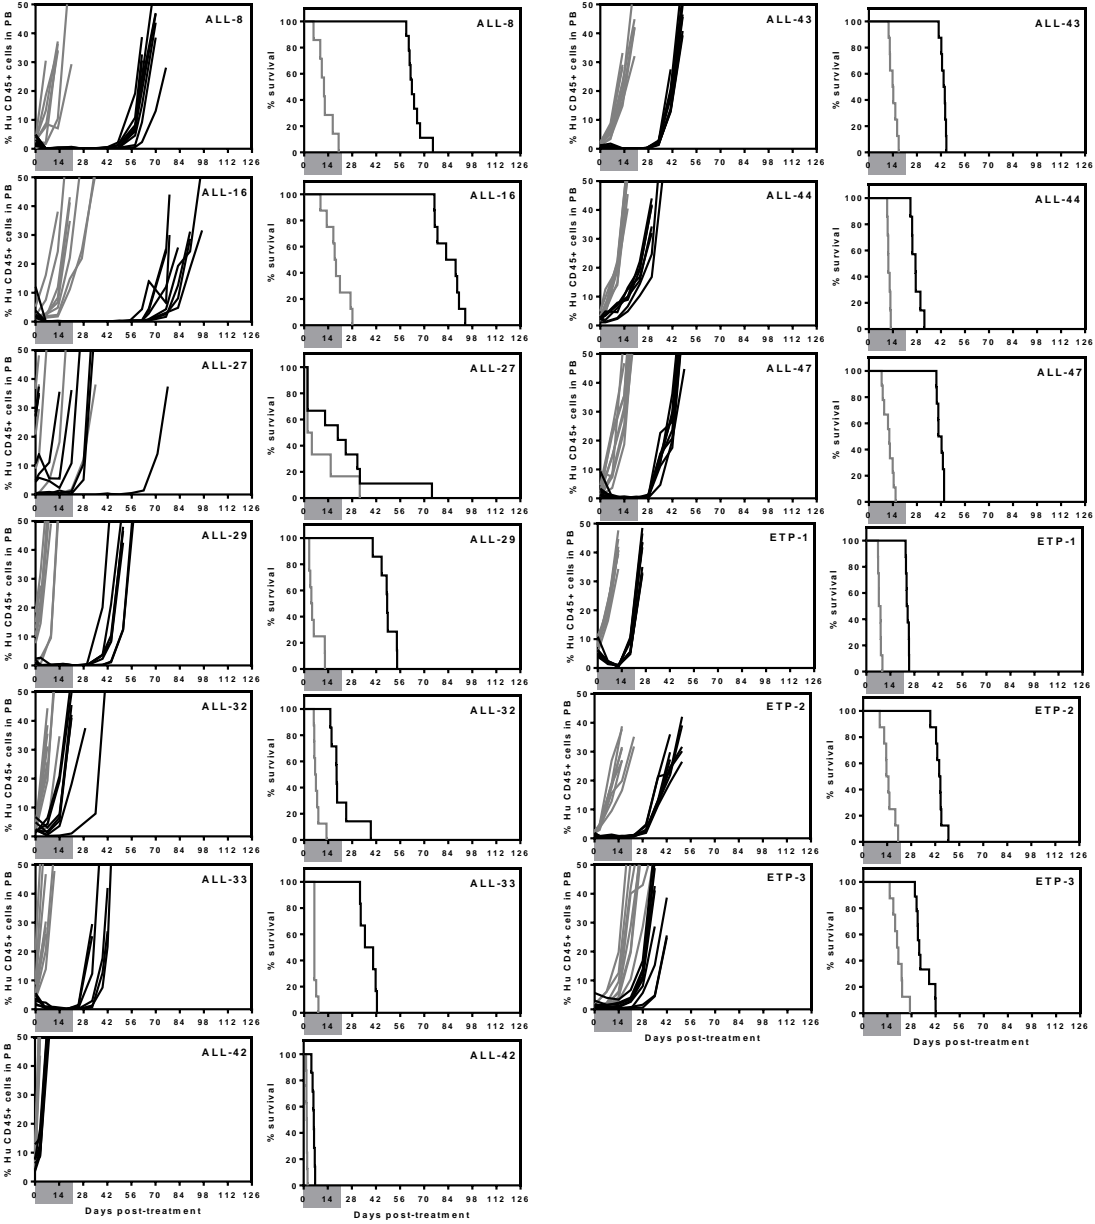

**Supplementary Figure S5. Correlation of xenograft *in vivo* responses to single agent ABT-263 with an induction-type combination regimen of vincristine, dexamethasone and L-asparaginase (VXL).** The ABT-263 Leukaemia Growth Delay (LGD) data are taken from Table 1. VXL LGD data are taken from Szymanska *et al* PLoS One. 2012;7:e33894.

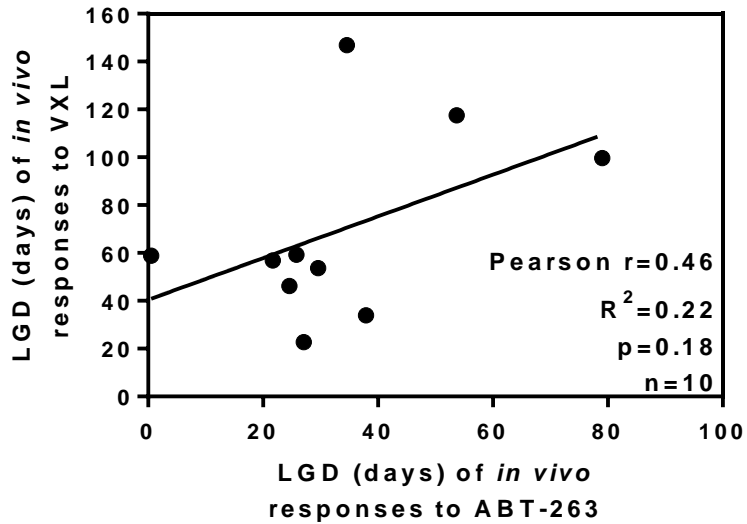

Supplement: NIHMS612561-supplement-5.pdf [file NIHMS612561-supplement-5.pdf]
