# Supplementary material
Source: PubMed Central journal article supplement (PMC4154988)

**Supplementary Figure S10. *In vitro* xenograft responses to ABT-263 by co-culture assay.** The percentages of live leukemia cells after exposure to various concentration of ABT263 (72 h) were measured by 7-AAD analysis using flow cytometry. Each line point represents an individual xenograft.

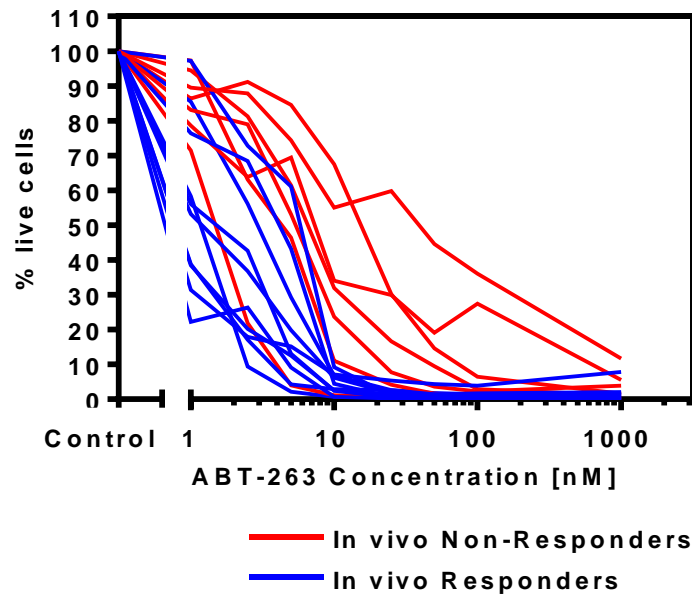

**Supplementary Figure S11. Formulae to determine assay sensitivity and specificity**

|                      | <b>Positive</b> | <b>Negative</b> |
|----------------------|-----------------|-----------------|
| <b>Patient (n=Y)</b> | True +          | False -         |
| <b>Normal (n=X)</b>  | False +         | True -          |

$$\text{Sensitivity} = \frac{\text{(true+)}}{\text{(true+) + (false-)}} \quad \text{X 100\%}$$

$$\text{Specificity} = \frac{\text{(true-)}}{\text{(true-) + (false+)}} \quad \text{X 100\%}$$

**Supplementary Figure S12. Live and dead cell analysis of each xenograft sample using 7-AAD staining and flow cytometry.** Live or dead cells were determined using flow cytometry and analyzed as shown in Supplementary Figure S1.

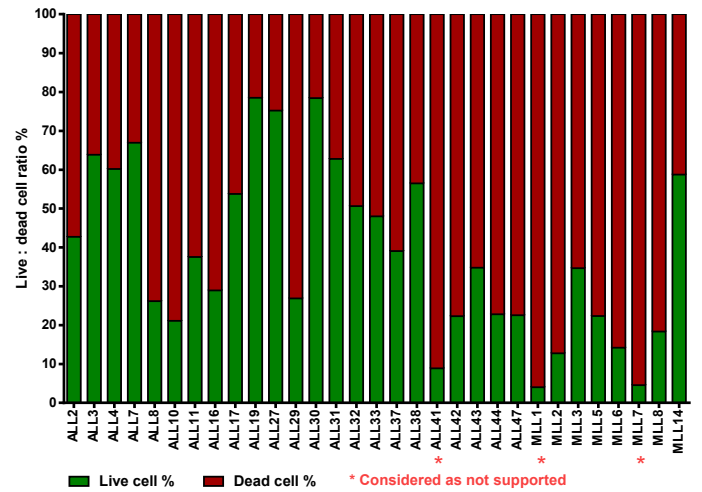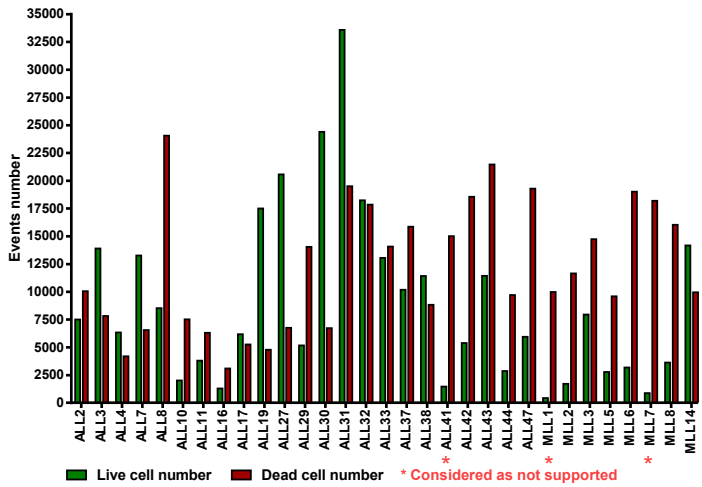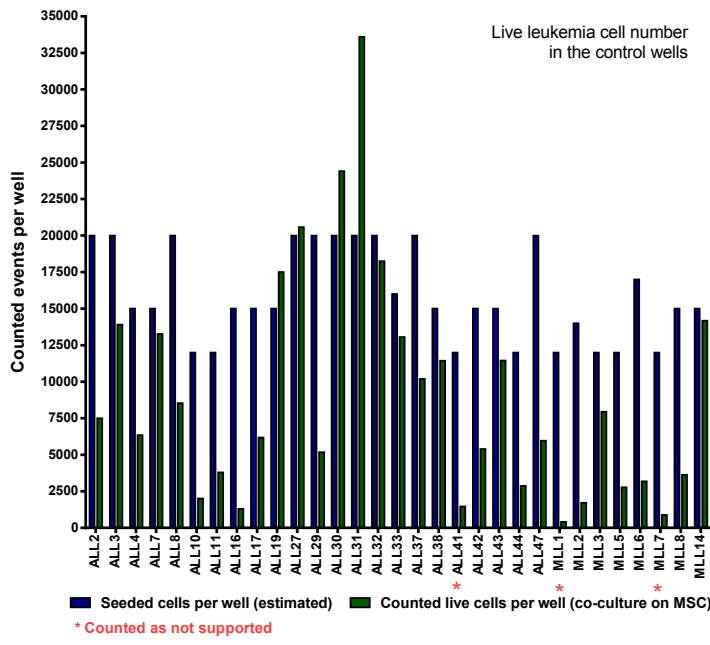

# Supplementary Figure S13. Comparison of ABT-263 responses for 5 xenograft samples in co-culture system versus single-cell suspension.

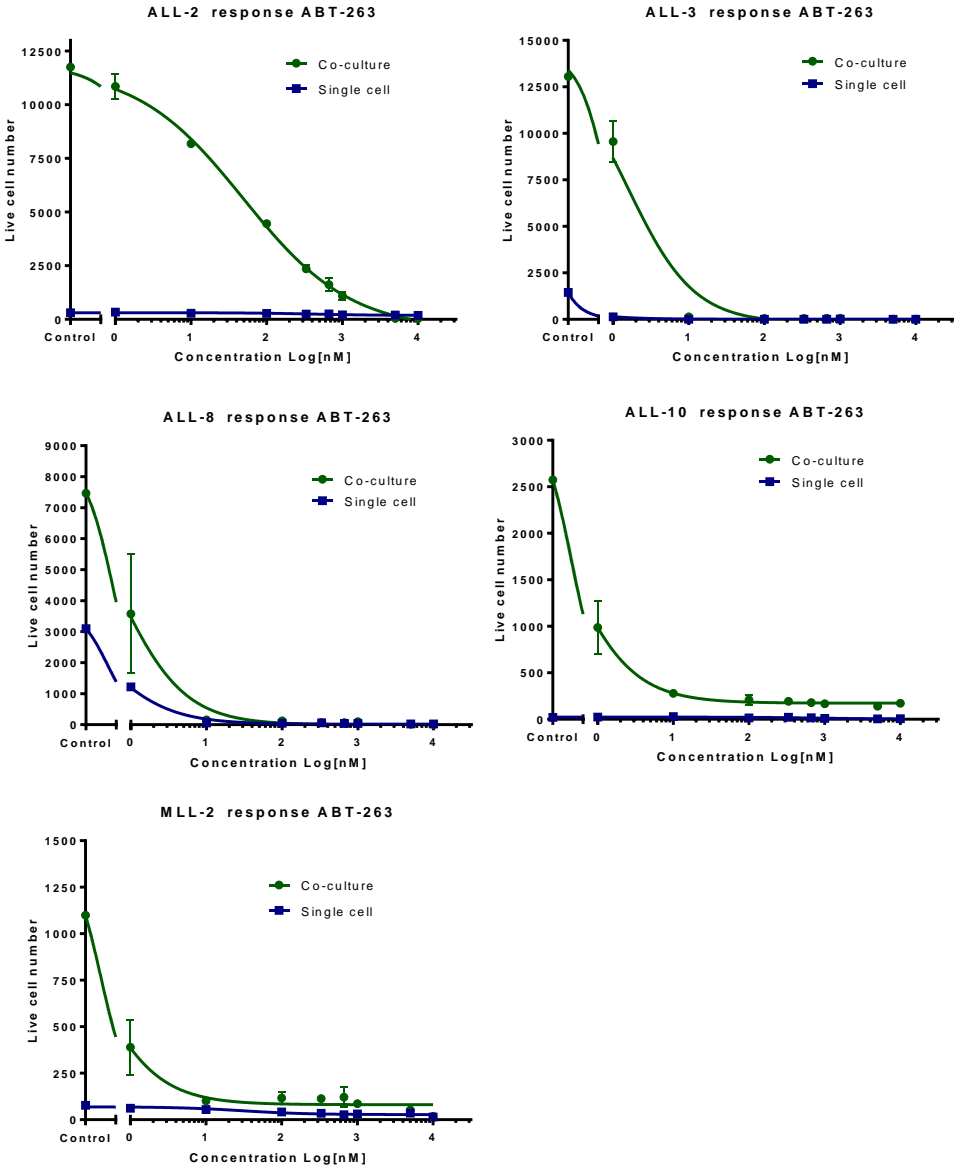

Supplement: NIHMS612561-supplement-7.pdf [file NIHMS612561-supplement-7.pdf]
