# Supplementary material
Source: PubMed Central journal article supplement (PMC4154988)

**Supplementary Figure S14. *In vivo* efficacy of ABT-263 in combination with established drugs against ALL-2, ALL-19 and ALL-31.** ABT-263 was combined with (A) vincristine (VCR), (B) dexamethasone (DEX) or (C) *L*-asparaginase (L-ASN). Left panels for each xenograft, %HuCD45<sup>+</sup> of individual mice over time; right panels for each xenograft, proportion of mice remaining event-free. Shaded areas indicate the treatment period.

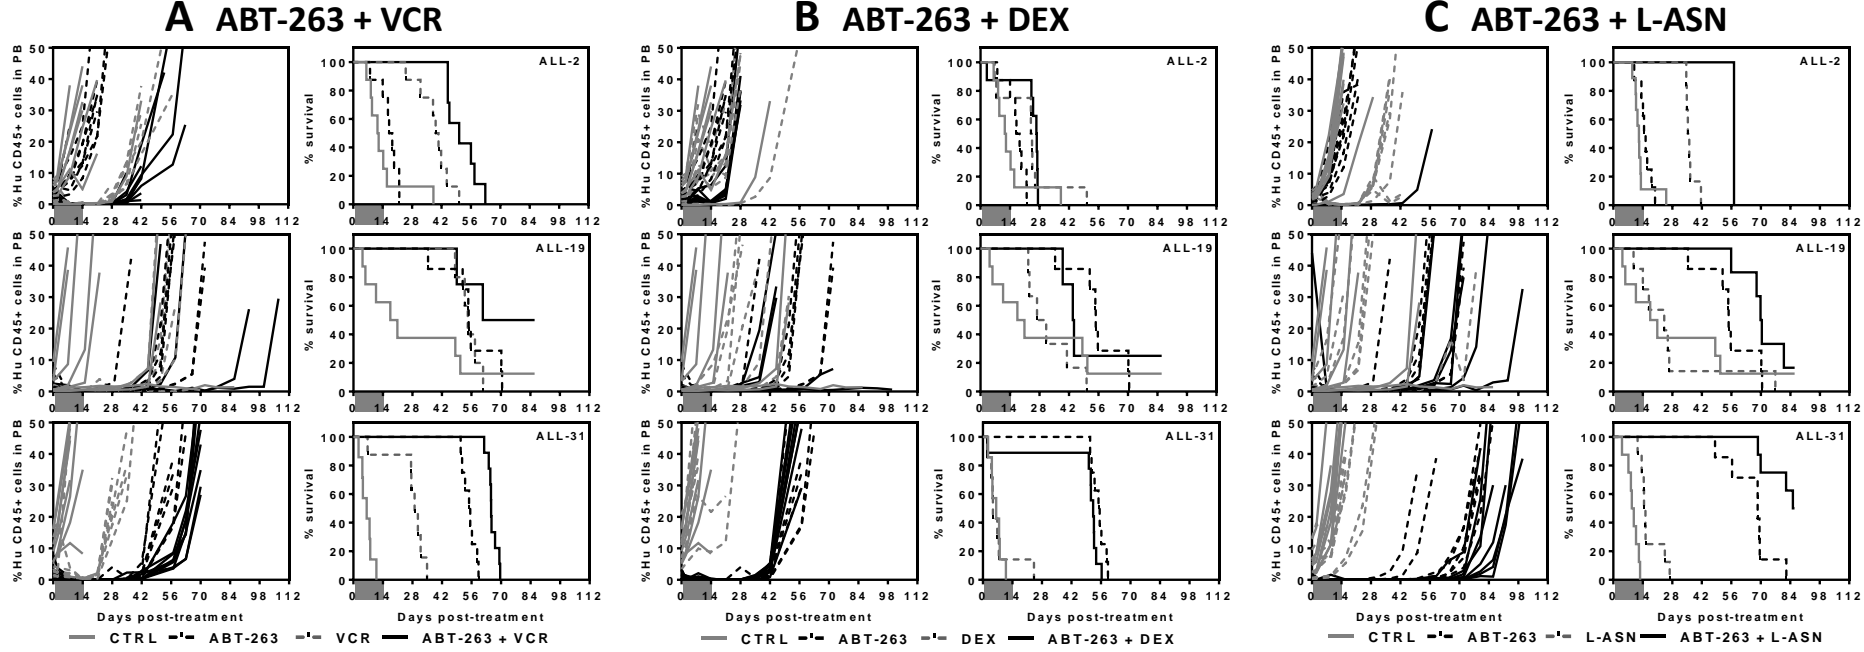

**Supplementary Figure S15. MCL1 protein expression at different stages of spleen extraction.** Proteins were extracted as described in the Materials and Method from two spleens at three stages: (1) freshly harvested spleen and post red cell lysis, (2) splenocytes post-Ficoll separation and (2) splenocytes post-Ficoll separation and cryopreservation. HL-60 and Raji cells were included as controls.

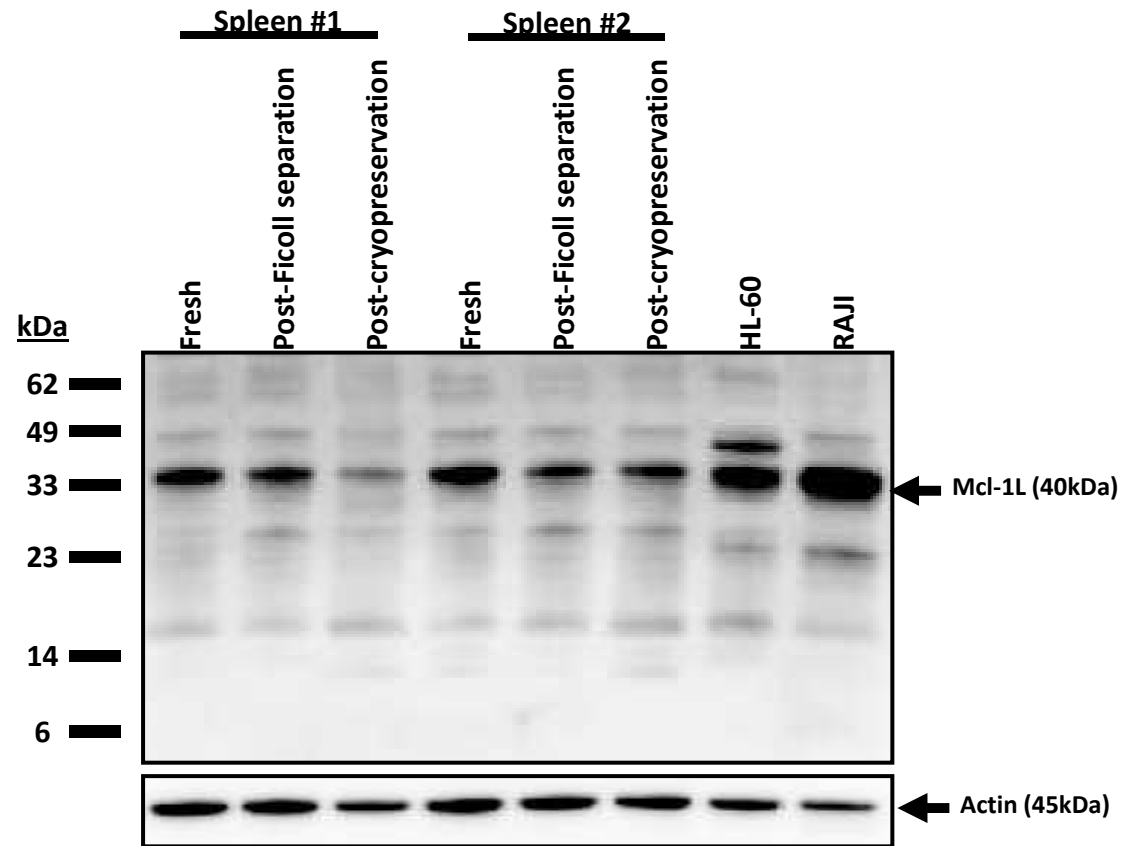

Supplement: NIHMS612561-supplement-8.pdf [file NIHMS612561-supplement-8.pdf]
